# Supplementary material for: Uncovering the Association Between m5C Regulator-Mediated Methylation Modification Patterns and Tumour Microenvironment Infiltration Characteristics in Hepatocellular Carcinoma
Source: Front Cell Dev Biol. 2021 Sep 13;9:727935. doi: 10.3389/fcell.2021.727935 (PMC8475949; doi:10.3389/fcell.2021.727935)
Supplement: Supplementary Table 2 — Estimating the relative abundance of tumour cells in the TME in the TCGA-LIHC cohort by single-sample gene set enrichment analysis (ssGSEA). [file Table_2.xlsx]

## Sheet: Sheet1
Supplementary Table 2: Estimating relative abundance of tumor microenvironment cells in TCGA-LIHC patients by the Single-Sample Gene-Set Enrichment Analysis (ssGSEA)
Tags	Cluster	Activated.B.cell	Activated.CD4.T.cell	Activated.CD8.T.cell	Gamma.delta.T.cell	Immature..B.cell	Regulatory.T.cell	T.follicular.helper.cell	Type.1.T.helper.cell	Type.17.T.helper.cell	Type.2.T.helper.cell	Activated.dendritic.cell	CD56bright.natural.killer.cell	CD56dim.natural.killer.cell	Eosinophil	Immature.dendritic.cell	Macrophage	Mast.cell	MDSC	Monocyte	Natural.killer.cell	Natural.killer.T.cell	Neutrophil	Plasmacytoid.dendritic.cell
TCGA-2V-A95S	Cluster_2	0.0237106	0.344625	0.531933	0.314442	0.101355	0.221414	0.215399	0.184844	0.134763	0.112968	0.33242	0.291144	0.36698	-0.0827711	0.341999	0.0993151	0.00451874	0.471564	0.49979	0.340597	0.14836	0.0106555	0.39449
TCGA-2Y-A9GS	Cluster_2	-0.26519	0.138075	0.195068	0.352263	-0.0722014	0.123515	0.140801	0.129246	0.021772	0.0607411	0.280259	0.266628	0.417236	-0.202742	0.364146	0.0722399	-0.0648808	0.298234	0.500184	0.271292	0.0792321	-0.167663	0.351539
TCGA-2Y-A9GT	Cluster_1	-0.0499427	0.167525	0.420114	0.335151	0.0392711	0.193938	0.177243	0.190888	-0.0033887	0.045996	0.287637	0.257583	0.383747	-0.168121	0.346871	0.0434543	-0.0335516	0.358947	0.516406	0.347013	0.0741539	-0.0961753	0.363431
TCGA-2Y-A9GU	Cluster_1	-0.25587	0.0502462	0.194727	0.277175	-0.13548	0.0175465	0.121333	0.102179	-0.06857	0.0697427	0.190381	0.262455	0.416925	-0.216657	0.306405	0.0433772	-0.112446	0.126902	0.476345	0.262113	-0.0249019	-0.208617	0.321839
TCGA-2Y-A9GV	Cluster_2	-0.196245	0.0909869	0.249674	0.363724	-0.045595	0.199617	0.154339	0.173856	-0.0163112	0.0653482	0.320909	0.264091	0.384944	-0.105195	0.355082	0.120046	0.0142625	0.354827	0.498368	0.316483	0.0585613	-0.0346949	0.363936
TCGA-2Y-A9GW	Cluster_1	-0.119803	0.165745	0.260302	0.323925	0.0466438	0.30963	0.194669	0.172159	-0.00177103	0.016052	0.346809	0.313973	0.419165	-0.126821	0.367644	0.130944	0.0171399	0.437649	0.500632	0.319342	0.133523	-0.0168444	0.390321
TCGA-2Y-A9GX	Cluster_2	-0.103566	0.218721	0.342151	0.349325	0.0174142	0.299557	0.21541	0.222252	0.0215501	0.0921601	0.307041	0.285658	0.411863	-0.0383039	0.40885	0.138597	0.0417445	0.495937	0.52034	0.373529	0.142576	-0.0926798	0.397077
TCGA-2Y-A9GY	Cluster_3	-0.0403306	0.266467	0.457974	0.353036	0.0592375	0.292516	0.206774	0.144607	0.0470814	0.106653	0.287788	0.284073	0.334116	-0.141211	0.37227	0.103933	0.0444499	0.488306	0.52879	0.251613	0.115024	-0.136125	0.390218
TCGA-2Y-A9GZ	Cluster_2	-0.257571	0.00302649	0.163077	0.338532	-0.13109	0.0454775	0.0778946	0.0770934	0.0273351	0.0725244	0.165823	0.245119	0.377621	-0.116701	0.334037	0.0143861	-0.126472	0.152086	0.471228	0.313011	0.00776011	-0.134627	0.345968
TCGA-2Y-A9H0	Cluster_2	-0.223657	0.25163	0.310679	0.305122	-0.0660253	0.0790471	0.116521	0.112564	0.0233233	0.170667	0.24701	0.276295	0.40994	-0.227635	0.348032	0.0784391	-0.0774562	0.302999	0.488998	0.26275	0.0941403	-0.0711522	0.306854
TCGA-2Y-A9H1	Cluster_1	-0.160356	0.0562294	0.375262	0.315083	-0.061246	0.136444	0.132366	0.143466	0.00549623	0.0226991	0.262086	0.303465	0.394237	-0.139111	0.346845	0.0576556	-0.0113097	0.344042	0.505254	0.271972	0.0589883	-0.0574479	0.36459
TCGA-2Y-A9H2	Cluster_3	-0.206869	0.107382	0.21149	0.284017	-0.0897442	0.0689918	0.0884671	0.129213	0.112039	-0.0429441	0.286029	0.233064	0.367748	-0.236922	0.361984	0.00447137	-0.120301	0.281126	0.457002	0.29238	0.0474768	-0.144626	0.338829
TCGA-2Y-A9H3	Cluster_1	0.0420188	0.0923223	0.428501	0.351918	0.0498747	0.203516	0.225718	0.184262	-0.0685551	0.0180811	0.254576	0.34126	0.44391	-0.0938485	0.35653	0.180883	0.288744	0.410784	0.529965	0.266708	0.065823	-0.0702741	0.353941
TCGA-2Y-A9H4	Cluster_2	-0.217957	0.0404195	0.277153	0.303551	-0.113078	0.115315	0.0982235	0.126124	-0.00656606	0.0772728	0.207787	0.305221	0.381038	-0.193773	0.321364	0.022357	-0.091249	0.274839	0.470145	0.304389	0.0513001	-0.159166	0.312505
TCGA-2Y-A9H5	Cluster_1	-0.153201	0.105741	0.22612	0.284087	-0.101722	0.0565535	0.144798	0.125326	-0.0365558	0.0533775	0.259523	0.257921	0.382574	-0.18826	0.324864	0.0162909	-0.0212357	0.239615	0.479802	0.308527	0.07221	-0.0532144	0.35343
TCGA-2Y-A9H6	Cluster_2	-0.112948	0.0912519	0.304683	0.303403	-0.0160331	0.156516	0.163752	0.178279	-0.0883954	-0.000669327	0.277761	0.290481	0.42942	-0.116549	0.322381	0.113688	0.0158255	0.355402	0.532121	0.29841	0.0884471	-0.0637245	0.324868
TCGA-2Y-A9H7	Cluster_2	-0.222326	0.111403	0.215692	0.273257	-0.0658022	0.0211559	0.141937	0.105972	-0.0451312	0.0902873	0.237046	0.276624	0.312974	-0.206264	0.349553	0.0475637	-0.0963051	0.220734	0.446314	0.293333	0.0680002	-0.0795973	0.368367
TCGA-2Y-A9H8	Cluster_3	-0.118337	0.14072	0.330777	0.311584	-0.0331231	0.0942656	0.158486	0.104113	-0.0477373	0.0663942	0.228447	0.197329	0.382327	-0.238162	0.308249	0.0561609	-0.0192082	0.368479	0.523223	0.300338	0.0139956	-0.133425	0.307104
TCGA-2Y-A9H9	Cluster_2	-0.272381	0.0593248	0.215647	0.305458	-0.0964324	0.0820665	0.106105	0.117367	-0.0476603	0.00146743	0.237291	0.285318	0.41565	-0.108756	0.328545	0.0484464	-0.0501478	0.269967	0.474671	0.289	0.0304261	-0.0626542	0.341836
TCGA-2Y-A9HA	Cluster_2	-0.3011	0.0682755	0.152862	0.334621	-0.170261	0.0457625	0.104433	0.0729941	-0.0309528	0.0131823	0.226613	0.269242	0.395772	-0.187707	0.332841	-0.026852	-0.0762608	0.236648	0.469219	0.233345	0.0398626	-0.216754	0.311611
TCGA-2Y-A9HB	Cluster_2	-0.171995	0.138065	0.340043	0.324566	-0.0225118	0.14107	0.148683	0.139497	-0.0324683	0.0139754	0.257211	0.309036	0.407615	-0.151676	0.336097	0.0392527	-0.0622017	0.315926	0.487749	0.315392	0.0805264	-0.111809	0.381276
TCGA-3K-AAZ8	Cluster_1	-0.162212	0.100963	0.307727	0.30385	-0.046712	0.0502331	0.125223	0.128165	-0.0684756	0.0351032	0.225238	0.240622	0.395678	-0.0873733	0.321959	-0.0258485	-0.0689579	0.24428	0.461537	0.257961	0.0465053	-0.174425	0.310479
TCGA-4R-AA8I	Cluster_2	-0.259287	0.104525	0.19303	0.340298	-0.113685	0.071134	0.110961	0.0939516	-0.0012816	0.0849297	0.2277	0.274385	0.381894	-0.144791	0.343081	-0.0108577	-0.0724824	0.268976	0.451605	0.311378	0.030445	-0.0773292	0.351419
TCGA-5C-A9VG	Cluster_3	-0.268005	0.101377	0.171689	0.26868	-0.15361	0.0532682	0.0859032	0.0722957	-0.100903	0.123767	0.201421	0.288665	0.38771	-0.111574	0.332494	0.0102234	0.0645951	0.162154	0.439441	0.226165	0.0268532	-0.186939	0.304671
TCGA-5C-A9VH	Cluster_2	-0.305792	0.0643644	0.212792	0.284065	-0.166661	0.0229135	0.105697	0.125218	-0.0421879	0.0450236	0.258552	0.298747	0.433717	-0.232058	0.284735	0.00198115	-0.101739	0.21806	0.474496	0.27654	0.0695073	-0.150367	0.360822
TCGA-5C-AAPD	Cluster_2	0.0230138	0.234817	0.38469	0.33305	0.0603441	0.241552	0.240535	0.174272	0.0173381	0.0749742	0.317747	0.260624	0.394525	-0.165638	0.323185	0.13105	-0.00408773	0.454414	0.516694	0.329217	0.121321	-0.151264	0.356066
TCGA-5R-AA1C	Cluster_2	-0.291672	0.0713699	0.271985	0.278852	-0.0381637	0.0947491	0.110811	0.110922	-0.045348	0.104357	0.218295	0.283954	0.349294	-0.125222	0.340955	-0.0634256	-0.028327	0.184368	0.43641	0.224599	0.0346413	-0.197034	0.311287
TCGA-5R-AA1D	Cluster_2	-0.165963	0.0599189	0.310717	0.330961	-0.0626093	0.231576	0.175402	0.200072	-0.0574513	0.0841304	0.264403	0.302821	0.372407	-0.174469	0.32712	0.136411	0.0307321	0.347274	0.490554	0.33611	0.153238	-0.0152908	0.377243
TCGA-5R-AAAM	Cluster_1	-0.148666	0.107796	0.309728	0.323197	-0.013109	0.289937	0.202136	0.179256	0.016799	0.0958968	0.263215	0.281665	0.403761	-0.0503522	0.359715	0.118338	0.0892341	0.379333	0.563278	0.342283	0.130298	-0.0588712	0.363394
TCGA-BC-4072	Cluster_2	-0.147059	0.215109	0.396858	0.315542	-0.00104088	0.212032	0.177713	0.172992	0.0614495	0.0794451	0.304828	0.249882	0.384217	-0.145491	0.357451	0.0815257	-0.0313421	0.376919	0.481056	0.353975	0.114199	-0.0755964	0.389981
TCGA-BC-4073	Cluster_2	-0.09969	0.294079	0.383191	0.393458	0.0983493	0.331968	0.217135	0.183124	0.0454146	0.174612	0.337523	0.260252	0.400267	-0.0955372	0.371612	0.155026	0.0694535	0.498902	0.507365	0.352523	0.125161	0.0825519	0.416223
TCGA-BC-A10Q	Cluster_2	-0.301702	0.096549	0.181689	0.196184	-0.074834	0.0518357	0.0950286	0.124731	0.0175303	0.0146984	0.231291	0.207895	0.267233	-0.111851	0.324001	0.032516	-0.0950666	0.231783	0.473606	0.308038	0.0471346	-0.255625	0.328058
TCGA-BC-A10R	Cluster_1	-0.303534	-0.0183673	0.141003	0.259786	-0.133068	0.114284	0.12327	0.103364	-0.000445042	-0.000193713	0.253633	0.273048	0.438119	-0.208371	0.319029	0.0372836	-0.0657209	0.215469	0.492933	0.293425	0.0754437	-0.0463444	0.344248
TCGA-BC-A10S	Cluster_1	-0.157641	0.0817722	0.336658	0.368083	-0.0429333	0.190817	0.182681	0.173771	-0.0113396	0.0537591	0.261957	0.268023	0.393735	-0.0749543	0.354277	0.141296	0.0291156	0.382377	0.490387	0.33472	0.117542	-0.0616243	0.355899
TCGA-BC-A10T	Cluster_2	-0.257092	0.0796031	0.243912	0.293322	-0.11585	0.148323	0.11321	0.141349	-0.0275342	0.104005	0.201916	0.304596	0.419639	-0.0838596	0.375088	0.0685555	0.0946259	0.24598	0.488659	0.344461	0.110546	-0.119509	0.326094
TCGA-BC-A10U	Cluster_2	-0.344529	0.0493422	0.19305	0.2854	-0.12809	0.067068	0.073549	0.100933	-0.0316425	0.0547837	0.299124	0.280536	0.403218	-0.168837	0.355564	-0.0368917	-0.107881	0.208466	0.477073	0.24149	0.0448502	-0.117588	0.353437
TCGA-BC-A10W	Cluster_3	-0.276218	0.21871	0.18304	0.309739	-0.0912582	0.160462	0.156643	0.103264	0.0254148	0.156715	0.284529	0.238368	0.407896	-0.166809	0.392019	0.0556254	-0.0564093	0.349539	0.464007	0.301178	0.114798	-0.0758598	0.342634
TCGA-BC-A10X	Cluster_2	-0.180474	0.121987	0.270367	0.322056	-0.00913802	0.272481	0.173242	0.193396	0.00554321	0.145611	0.222527	0.281721	0.38489	-0.0581563	0.382845	0.118861	0.0111127	0.359712	0.528339	0.321696	0.103421	-0.00120688	0.322794
TCGA-BC-A10Y	Cluster_2	-0.248417	0.21152	0.23671	0.299696	-0.0964143	0.0817903	0.087043	0.0959278	0.0164436	0.0722052	0.22786	0.259205	0.364718	-0.153726	0.302136	0.055877	-0.120991	0.266153	0.49028	0.279188	0.0507361	-0.176024	0.304987
TCGA-BC-A10Z	Cluster_2	-0.352263	0.0343328	0.112123	0.295466	-0.16848	0.0108419	0.0303534	0.0395233	0.0122378	0.0263768	0.189725	0.267868	0.330484	-0.187738	0.318597	-0.0115788	-0.189387	0.106975	0.474869	0.275185	0.000631734	-0.0592925	0.3103
TCGA-BC-A110	Cluster_1	-0.138704	0.14194	0.332763	0.348976	-0.0383328	0.336046	0.203058	0.249841	0.0557647	0.118729	0.260947	0.282271	0.419067	-0.0106091	0.424597	0.199542	0.15028	0.473695	0.550075	0.348873	0.156645	0.129665	0.372506
TCGA-BC-A112	Cluster_3	-0.189814	0.159323	0.153951	0.282643	-0.0972831	0.112668	0.136184	0.105488	0.0476992	0.0710457	0.256712	0.291184	0.383321	-0.222868	0.338601	0.0223837	-0.0536154	0.276046	0.47077	0.305882	0.117031	-0.251281	0.377156
TCGA-BC-A216	Cluster_2	-0.2349	0.306796	0.352506	0.290016	-0.139891	0.0208329	0.0957918	0.111525	0.0160346	0.153482	0.274097	0.286773	0.42111	-0.144563	0.299649	0.0300739	-0.0714733	0.335755	0.475528	0.293648	0.0842977	-0.095215	0.326313
TCGA-BC-A217	Cluster_2	-0.227167	0.171541	0.311908	0.30668	-0.108708	0.107928	0.0746741	0.105818	-0.0869452	0.0962935	0.253198	0.287065	0.356993	-0.203298	0.304617	0.0604005	-0.115233	0.287738	0.456088	0.264518	0.0853588	-0.153811	0.337238
TCGA-BC-A3KF	Cluster_2	-0.285987	0.0270834	0.189757	0.312102	-0.156399	0.0663207	0.0596609	0.0739598	-0.00947739	0.0678757	0.212536	0.275246	0.386137	-0.188611	0.310336	0.0187058	-0.0590661	0.177813	0.505637	0.286028	0.0176301	-0.134154	0.302936
TCGA-BC-A3KG	Cluster_3	-0.324489	0.225932	0.137339	0.220153	-0.127444	0.00787004	0.0650016	0.0492173	-0.0596552	0.109967	0.177035	0.24942	0.312722	-0.222609	0.343041	-0.0134243	-0.151249	0.222373	0.459691	0.259335	0.0300566	-0.114593	0.313957
TCGA-BC-A5W4	Cluster_1	-0.353135	-0.0553598	0.195651	0.240366	-0.215357	-0.0435939	0.0596931	0.0657366	0.0119447	-0.0149649	0.193693	0.319525	0.398516	-0.238667	0.304144	-0.0589768	-0.14269	0.157633	0.542602	0.247044	0.0247594	-0.181539	0.328604
TCGA-BC-A69H	Cluster_3	-0.251461	0.158556	0.29194	0.313744	-0.0860239	0.18869	0.200463	0.112783	-0.00292775	0.0686354	0.277455	0.279309	0.413591	-0.196776	0.31175	0.0833579	0.0251964	0.386895	0.511934	0.228967	0.0826552	-0.0886024	0.368603
TCGA-BC-A69I	Cluster_1	-0.22994	-0.00288937	0.262546	0.323424	-0.109058	0.0874502	0.158788	0.156831	0.00207488	0.0400939	0.243923	0.283123	0.397945	-0.0287068	0.335735	0.0435718	0.0397695	0.297326	0.49315	0.289407	0.0778354	-0.0997099	0.311126
TCGA-BC-A8YO	Cluster_2	-0.170157	0.287917	0.339081	0.31307	0.0104164	0.188083	0.19651	0.133014	0.00994877	0.149203	0.300599	0.250843	0.390509	-0.179518	0.346483	0.0453583	-0.0705933	0.378127	0.489782	0.28814	0.107638	-0.175064	0.305118
TCGA-BD-A2L6	Cluster_2	-0.243218	0.0986667	0.265863	0.312718	-0.140691	0.0428446	0.0868043	0.107349	-0.0126861	0.0982049	0.221103	0.266148	0.419385	-0.136927	0.302411	0.0242459	-0.0453745	0.27395	0.52204	0.270924	0.0664233	-0.0684787	0.323068
TCGA-BD-A3EP	Cluster_2	0.129699	0.19846	0.33523	0.311608	0.113188	0.186752	0.222717	0.191988	-0.042686	0.0550458	0.294456	0.259268	0.450439	-0.032593	0.329081	0.0664265	-0.0400347	0.366883	0.525189	0.340144	0.112403	-0.108135	0.410984
TCGA-BD-A3ER	Cluster_2	-0.191484	0.0949969	0.196656	0.307905	-0.0905189	0.145868	0.166454	0.161332	0.0345233	0.0251509	0.341528	0.263881	0.403592	-0.121881	0.367239	0.0759988	-0.0196851	0.342415	0.548275	0.323711	0.106557	-0.02484	0.377483
TCGA-BW-A5NO	Cluster_2	-0.185881	0.106415	0.282777	0.332983	-0.0746657	0.143326	0.11995	0.123323	-0.00335943	0.0680189	0.232144	0.285222	0.382401	-0.196141	0.323331	0.0563536	0.00205265	0.356105	0.492137	0.296377	0.0709374	-0.10004	0.34666
TCGA-BW-A5NP	Cluster_2	-0.242458	0.143459	0.172107	0.303998	-0.160957	-0.00313363	0.123712	0.0593861	-0.130047	0.0597817	0.24992	0.257009	0.297036	-0.206698	0.299014	-0.0229971	-0.145131	0.134309	0.465844	0.235527	0.0408555	-0.178569	0.315472
TCGA-BW-A5NQ	Cluster_3	-0.0470209	0.346992	0.390284	0.368865	0.0449713	0.195322	0.188265	0.145729	-0.0375151	0.150172	0.273894	0.258824	0.319077	-0.178868	0.351622	0.0354781	-0.0552144	0.35673	0.519736	0.266374	0.0869894	-0.202737	0.3234
TCGA-CC-5258	Cluster_3	-0.189982	0.190441	0.227282	0.314787	-0.0507417	0.177652	0.18839	0.116123	-0.0237882	0.112484	0.263829	0.253093	0.358766	-0.192706	0.383494	0.0323727	0.012721	0.280733	0.493277	0.289591	0.0861958	-0.0357345	0.355682
TCGA-CC-5259	Cluster_1	-0.27779	0.129766	0.31284	0.295959	-0.156815	0.00390665	0.080925	0.104083	-0.0118759	0.109726	0.282491	0.316671	0.375905	-0.22588	0.293585	0.0308081	-0.0803403	0.287115	0.517348	0.254107	0.0782683	0.0273966	0.380784
TCGA-CC-5260	Cluster_3	-0.185827	0.133767	0.246581	0.291504	-0.015221	0.130929	0.164038	0.153635	-0.00805038	0.0288374	0.263321	0.234698	0.343318	-0.235277	0.328269	0.0191807	-0.0740252	0.322513	0.404592	0.342831	0.0952312	-0.229268	0.378623
TCGA-CC-5261	Cluster_3	0.0353319	0.229746	0.309697	0.285027	0.0427699	0.120577	0.175373	0.186761	-0.0742282	0.12746	0.268884	0.270757	0.374892	-0.147417	0.351631	0.10621	-0.0099747	0.346753	0.507617	0.363182	0.0967042	-0.119461	0.381217
TCGA-CC-5262	Cluster_2	-0.179586	0.183714	0.347598	0.354949	-0.0365638	0.190153	0.173682	0.167469	0.0269081	0.0795091	0.300132	0.298997	0.431098	-0.160023	0.378936	0.107951	0.0145447	0.398136	0.496134	0.348122	0.107457	0.0805709	0.366576
TCGA-CC-5263	Cluster_3	-0.27904	0.20451	0.137988	0.275132	-0.0418084	0.184981	0.128537	0.073702	0.0118718	0.15228	0.312384	0.236485	0.364079	-0.163654	0.334804	0.00798968	0.00387144	0.315065	0.482327	0.312114	0.0990844	-0.0702586	0.323345
TCGA-CC-5264	Cluster_3	-0.273216	0.197875	0.230606	0.289146	-0.166867	0.0467427	0.0852911	0.0786923	-0.0528054	0.140396	0.283166	0.266128	0.381878	-0.238524	0.318712	-0.022232	-0.102437	0.206126	0.515134	0.265124	0.104012	-0.123551	0.317978
TCGA-CC-A123	Cluster_1	-0.210807	0.107753	0.244371	0.333168	-0.075822	0.1077	0.1086	0.109783	-0.0545936	0.0634574	0.268926	0.260809	0.322406	-0.152004	0.317603	0.0588029	0.000348632	0.281475	0.50572	0.252302	0.0741462	-0.0376121	0.36253
TCGA-CC-A1HT	Cluster_3	-0.0713026	0.300877	0.433786	0.337945	0.073927	0.340463	0.241946	0.193653	0.0177034	0.165819	0.325769	0.270826	0.285893	-0.153109	0.446418	0.128057	0.0285626	0.531646	0.443542	0.355344	0.175049	-0.0876049	0.383159
TCGA-CC-A3M9	Cluster_3	-0.0201752	0.360701	0.516709	0.38262	0.115164	0.463498	0.344664	0.234989	-0.0119598	0.210253	0.317164	0.261949	0.399081	-0.0818476	0.346252	0.268781	0.101368	0.614031	0.408893	0.371162	0.246835	-0.156203	0.415584
TCGA-CC-A3MA	Cluster_3	-0.263515	0.104124	0.179682	0.306138	-0.149373	0.0902094	0.110014	0.119441	-0.0625205	0.0784702	0.230848	0.196898	0.400876	-0.212726	0.315568	-0.0603335	-0.118228	0.195636	0.448976	0.320484	0.0571114	-0.214093	0.335316
TCGA-CC-A3MB	Cluster_2	-0.279404	0.191595	0.211367	0.286264	-0.12241	0.0856282	0.108973	0.117114	-0.0273557	0.0961401	0.239722	0.254129	0.397188	-0.178405	0.319947	0.00133822	-0.0872416	0.219491	0.490784	0.273802	0.0785646	-0.01965	0.350121
TCGA-CC-A3MC	Cluster_2	-0.237918	0.154315	0.189142	0.281433	-0.153858	0.0648062	0.162443	0.130279	0.047289	0.0898195	0.260237	0.296103	0.426408	-0.216476	0.324571	0.0688605	-0.0772973	0.298853	0.488288	0.312629	0.104969	-0.017698	0.363713
TCGA-CC-A5UC	Cluster_3	-0.160135	0.206	0.274783	0.34814	-0.0625964	0.154602	0.139118	0.134018	-0.0253063	0.0903429	0.257492	0.275065	0.405073	-0.167178	0.384352	0.0524286	-0.0132824	0.294158	0.49017	0.281984	0.0859675	-0.120063	0.340624
TCGA-CC-A5UD	Cluster_3	-0.309722	0.136325	0.229659	0.30206	-0.162847	0.0580335	0.162353	0.0739038	-0.0259215	0.0813869	0.215766	0.239426	0.40372	-0.218102	0.283258	-0.0333361	-0.0854044	0.130226	0.490358	0.216114	0.0957048	-0.175423	0.368816
TCGA-CC-A5UE	Cluster_3	-0.331344	0.138353	0.227658	0.324925	-0.134905	0.0600713	0.109427	0.0702034	0.0457759	0.121563	0.268866	0.225122	0.393282	-0.188291	0.371457	-0.0219287	-0.121561	0.206613	0.507729	0.228351	0.0812301	-0.103283	0.311481
TCGA-CC-A7IE	Cluster_3	-0.066392	0.279607	0.397309	0.307602	0.0326634	0.164331	0.188731	0.163198	-0.0189862	0.0522158	0.281261	0.270592	0.35874	-0.0614868	0.353654	0.0549665	-0.00961512	0.380668	0.500322	0.253589	0.100928	-0.0979357	0.382235
TCGA-CC-A7IF	Cluster_1	-0.27926	0.0205582	0.181436	0.28568	-0.185954	-0.0479349	0.0835582	0.0823909	0.01878	0.00764045	0.22713	0.260224	0.424306	-0.177873	0.306528	0.00523031	-0.139402	0.116094	0.436448	0.269125	0.0297313	-0.150181	0.295499
TCGA-CC-A7IG	Cluster_3	-0.276852	0.131284	0.204181	0.285107	-0.132191	0.0623242	0.180964	0.11662	-0.0742711	0.093696	0.266652	0.272988	0.391195	-0.168986	0.292283	0.0288652	-0.0760836	0.331675	0.474947	0.266593	0.0624251	-0.0798534	0.348641
TCGA-CC-A7IH	Cluster_2	-0.312191	-0.0271375	0.193655	0.299565	-0.137225	-7.68286e-05	0.115514	0.10235	-0.023194	0.114806	0.149995	0.25488	0.334928	-0.0975089	0.317676	-0.0640342	-0.0509206	0.0976819	0.452647	0.242544	0.0126577	-0.254991	0.311659
TCGA-CC-A7II	Cluster_3	-0.268092	0.122223	0.161375	0.25501	-0.250963	0.057328	0.0607161	0.0352589	-0.112274	0.106957	0.215711	0.219094	0.413027	-0.0106283	0.340227	-0.00842951	-0.0924751	0.224828	0.357499	0.209105	0.065455	-0.291067	0.316109
TCGA-CC-A7IJ	Cluster_3	-0.177992	0.31953	0.443367	0.336905	0.0454529	0.277175	0.258501	0.195268	0.0236535	0.183193	0.278017	0.314661	0.38903	-0.172419	0.371025	0.18122	-0.0222594	0.478352	0.359325	0.337206	0.184452	-0.271557	0.395956
TCGA-CC-A7IK	Cluster_2	-0.340981	0.0686725	0.153917	0.302991	-0.15086	0.00417929	0.0989016	0.0612211	-0.0708319	0.0649998	0.173949	0.237517	0.357684	-0.199515	0.332204	-0.0927007	-0.120148	0.0925978	0.497628	0.20444	0.0680173	-0.271912	0.295152
TCGA-CC-A7IL	Cluster_1	-0.385969	-0.00235451	0.19888	0.328469	-0.153642	0.00181832	0.0547482	0.0565286	-0.00463465	0.000102906	0.174713	0.223213	0.390234	-0.0959549	0.329997	-0.0625407	-0.153958	0.0785016	0.445729	0.244404	0.0222512	-0.131683	0.286093
TCGA-CC-A8HS	Cluster_3	-0.241141	0.146703	0.15179	0.261854	-0.173581	-0.0251607	0.0689378	0.0324944	-0.0639838	0.120236	0.217133	0.256208	0.338511	-0.165417	0.336991	-0.0280666	-0.121545	0.160225	0.468242	0.268338	0.0361262	-0.11395	0.288491
TCGA-CC-A8HT	Cluster_3	-0.24502	0.243509	0.244574	0.331031	-0.0575862	0.13481	0.128634	0.0855459	0.0107525	0.0854067	0.297048	0.293995	0.347984	-0.177457	0.354677	0.0304823	0.0106615	0.348826	0.493142	0.264051	0.12399	-0.0825272	0.344577
TCGA-CC-A8HU	Cluster_3	-0.28123	0.0832531	0.130689	0.261025	-0.199216	-0.0119112	0.098388	0.0874844	-0.069806	0.0425861	0.213041	0.248437	0.399322	-0.199011	0.317062	0.0193385	-0.0364977	0.211617	0.490789	0.240937	0.0748386	-0.153498	0.268265
TCGA-CC-A8HV	Cluster_3	-0.263112	0.0772032	0.160225	0.233192	-0.145852	-0.0757381	0.0704597	0.090004	-0.0281398	0.0314642	0.221375	0.233644	0.39967	-0.200867	0.318028	-0.0415854	-0.133853	0.2079	0.471937	0.255374	0.00940582	-0.0371006	0.340474
TCGA-CC-A9FS	Cluster_1	-0.22017	0.0933834	0.216928	0.297131	-0.122938	0.0630186	0.124302	0.122862	-0.00480047	0.0587302	0.244469	0.276949	0.388714	-0.131504	0.321471	0.0445621	-0.0858895	0.151222	0.469378	0.271862	0.0815041	-0.104894	0.320464
TCGA-CC-A9FU	Cluster_3	-0.228908	0.151198	0.241695	0.331597	-0.0845328	0.0227358	0.10579	0.0575405	-0.083294	0.0829717	0.235595	0.274198	0.282758	-0.211991	0.30059	-0.0341974	-0.0105698	0.201463	0.452519	0.203272	0.0533063	-0.191605	0.239562
TCGA-CC-A9FV	Cluster_2	-0.0914754	0.0570373	0.408497	0.361923	0.0908223	0.328107	0.290847	0.19257	-0.0957244	0.132604	0.269368	0.281528	0.337653	-0.0439676	0.437593	0.221078	0.264664	0.511435	0.469962	0.305358	0.149342	-0.185209	0.412975
TCGA-CC-A9FW	Cluster_3	-0.159095	0.112807	0.256543	0.33434	-0.0725095	0.0876773	0.0999894	0.0992952	-0.105914	0.0681784	0.219787	0.256866	0.334274	-0.191162	0.324412	-0.0373762	0.0358416	0.263222	0.506743	0.181986	0.0465688	-0.21961	0.315087
TCGA-DD-A113	Cluster_2	-0.255592	0.187814	0.227692	0.267652	-0.0849774	0.101786	0.12563	0.111462	-0.0318766	0.084244	0.275775	0.301044	0.413706	-0.175994	0.336984	0.0504373	-0.0332763	0.299097	0.472886	0.299785	0.0913375	-0.0789697	0.322461
TCGA-DD-A114	Cluster_3	-0.0119642	0.295293	0.351792	0.333446	0.0734097	0.266709	0.222789	0.195484	0.00459479	0.186213	0.288791	0.305721	0.433473	-0.142948	0.405887	0.115117	0.0857595	0.450855	0.495779	0.386589	0.148923	-0.137704	0.37177
TCGA-DD-A115	Cluster_2	-0.254477	0.120871	0.25981	0.335576	-0.102511	0.0954275	0.106952	0.145247	0.0328873	0.0848652	0.222344	0.265294	0.427928	-0.171812	0.335472	0.0431116	-0.0325933	0.286665	0.508547	0.347358	0.0738935	-0.0912716	0.337441
TCGA-DD-A116	Cluster_1	-0.214532	0.0272116	0.267738	0.324013	-0.13626	0.0672646	0.162549	0.128195	0.0229836	0.0637976	0.25452	0.305762	0.396053	-0.164646	0.327027	0.0289553	0.0520663	0.256548	0.466776	0.240636	0.0956991	-0.236327	0.336373
TCGA-DD-A118	Cluster_2	-0.298222	0.00188852	0.172994	0.253339	-0.117532	0.0696157	0.140885	0.132498	-0.0676186	0.0249645	0.20098	0.26952	0.439541	-0.160036	0.320356	0.014671	-0.0737424	0.189432	0.479902	0.244408	0.0144078	-0.135918	0.327723
TCGA-DD-A119	Cluster_1	-0.245367	0.074728	0.256042	0.301496	-0.115283	0.109326	0.114844	0.136681	-0.02734	0.0159909	0.253218	0.278379	0.402173	-0.125517	0.326698	0.0709809	-0.0241494	0.262263	0.507538	0.270836	0.121589	-0.100685	0.315879
TCGA-DD-A11A	Cluster_2	-0.330694	0.0811	0.177485	0.305721	-0.187459	0.0494066	0.0660891	0.0765522	0.0142533	0.0899975	0.206137	0.294771	0.404062	-0.105643	0.358284	0.00344863	-0.0925241	0.212347	0.451423	0.288523	0.0982843	-0.0829395	0.304587
TCGA-DD-A11B	Cluster_2	-0.275134	0.0474241	0.166878	0.275335	-0.168429	0.0254347	0.101101	0.102716	-0.0145929	0.0382195	0.233033	0.254431	0.371864	-0.181813	0.319497	0.018092	-0.0505453	0.118295	0.519457	0.279907	0.0226471	-0.0906389	0.318505
TCGA-DD-A11C	Cluster_2	-0.193792	0.13744	0.224244	0.338382	-0.104141	0.0897177	0.151512	0.115643	0.0123124	0.111621	0.225401	0.247436	0.38467	-0.0793344	0.340837	0.0590048	0.0137204	0.267351	0.464053	0.330181	0.0931845	-0.0916874	0.340082
TCGA-DD-A11D	Cluster_1	-0.240433	0.0137757	0.192428	0.312513	-0.12327	0.0857641	0.104741	0.101333	0.0035087	0.0243608	0.239926	0.263209	0.387753	-0.0961278	0.325989	0.013727	-0.0857911	0.196558	0.52012	0.306059	0.0269081	-0.0883894	0.342151
TCGA-DD-A1EA	Cluster_2	-0.128694	0.155211	0.290227	0.293716	-0.00257544	0.149829	0.15957	0.123607	-0.0514315	0.119303	0.287312	0.229339	0.345259	-0.121895	0.332538	-0.0162128	-0.131915	0.285979	0.461367	0.277222	0.0641978	-0.245997	0.336969
TCGA-DD-A1EB	Cluster_2	-0.26176	-0.0159441	0.236389	0.234169	-0.111863	0.107071	0.106774	0.110957	-0.0724891	0.0479375	0.220114	0.248459	0.385245	-0.136924	0.325899	-0.0195872	-0.121862	0.198265	0.505417	0.283299	0.0155972	-0.120002	0.331958
TCGA-DD-A1EC	Cluster_2	-0.0502003	0.25131	0.54999	0.344835	0.0936191	0.29176	0.229373	0.177105	0.033257	0.164745	0.31724	0.266696	0.411184	-0.101172	0.337171	0.114285	0.00945172	0.460639	0.544859	0.327315	0.155965	-0.169378	0.354971
TCGA-DD-A1ED	Cluster_1	-0.155908	0.119801	0.299084	0.320805	-0.0132715	0.20285	0.198856	0.219167	-0.00858209	0.12963	0.302722	0.294601	0.380482	0.0230924	0.395159	0.0952552	0.195891	0.368893	0.516	0.314763	0.0728077	-0.0198407	0.35862
TCGA-DD-A1EE	Cluster_2	-0.296007	0.0721014	0.128958	0.330258	-0.101606	0.0734023	0.141539	0.104676	-0.0390184	0.0334095	0.275485	0.258185	0.374356	-0.134623	0.340646	-0.0381819	-0.13397	0.145416	0.467894	0.243134	0.0435824	-0.223552	0.345212
TCGA-DD-A1EF	Cluster_3	-0.0309961	0.162784	0.266216	0.300482	-0.00560281	0.151439	0.158526	0.101331	-0.0869187	0.0420533	0.240215	0.260842	0.343433	-0.185281	0.323853	0.0286256	-0.062207	0.245693	0.522235	0.26334	0.0633406	-0.219676	0.273257
TCGA-DD-A1EG	Cluster_2	-0.115851	0.192938	0.347576	0.350033	0.0201064	0.227774	0.188414	0.169236	-0.0191664	0.0672713	0.319155	0.303178	0.412904	-0.174168	0.358995	0.112539	0.0344959	0.411963	0.523165	0.331025	0.13666	-0.0999347	0.373994
TCGA-DD-A1EH	Cluster_2	-0.203918	0.168936	0.187784	0.334576	-0.0991676	0.0456571	0.122009	0.0691919	-0.0761932	0.087241	0.218258	0.220784	0.315622	-0.226268	0.296965	0.00684111	-0.072527	0.189608	0.509868	0.321694	0.0770807	-0.0962224	0.332743
TCGA-DD-A1EI	Cluster_2	-0.216578	0.135412	0.223986	0.301595	-0.0756398	0.158074	0.151565	0.137305	-0.0225293	0.0919236	0.27798	0.265168	0.400645	-0.174231	0.352858	0.0480944	-0.00170983	0.26401	0.490053	0.335271	0.106534	-0.0633202	0.399624
TCGA-DD-A1EJ	Cluster_3	-0.34293	0.12504	0.206034	0.337214	-0.101688	0.104874	0.146124	0.111447	-0.0747831	0.0844668	0.252166	0.307528	0.307698	-0.219172	0.35709	0.0208495	-0.045845	0.278486	0.52099	0.193041	0.0806716	-0.186494	0.333045
TCGA-DD-A1EK	Cluster_1	-0.283721	0.0562271	0.210055	0.374361	-0.0241414	0.205614	0.152186	0.149887	0.010348	0.0575212	0.287233	0.280313	0.418766	-0.137519	0.363999	0.108151	-0.022612	0.460236	0.511	0.29259	0.084753	-0.0883782	0.349335
TCGA-DD-A1EL	Cluster_2	-0.298304	0.142775	0.215395	0.343244	-0.0309938	0.164757	0.139	0.102236	-0.096839	0.0579047	0.286659	0.278003	0.337293	-0.181225	0.35001	0.00818805	-0.0899189	0.191014	0.468846	0.186177	0.10885	-0.238904	0.373211
TCGA-DD-A39V	Cluster_1	-0.142994	0.139062	0.414078	0.383799	-0.0305665	0.19844	0.190003	0.169004	-0.0399587	0.0872565	0.219896	0.288642	0.357714	-0.168486	0.350412	0.0869668	0.037757	0.405186	0.480823	0.266637	0.0997969	-0.15395	0.349842
TCGA-DD-A39W	Cluster_2	-0.199107	0.0315734	0.197905	0.321444	-0.0665406	0.0447026	0.177753	0.0798261	-0.124718	0.0897892	0.198564	0.253333	0.29669	-0.132142	0.358058	-0.0513076	-0.0306471	0.163939	0.480496	0.234334	0.0182822	-0.194714	0.375049
TCGA-DD-A39X	Cluster_1	-0.190274	0.058447	0.26768	0.287017	-0.0757679	0.122831	0.122417	0.141369	0.0194225	-0.0311589	0.247665	0.263316	0.409833	-0.166821	0.299748	0.0998355	-0.0191247	0.284328	0.521803	0.267224	0.0799458	-0.121488	0.334008
TCGA-DD-A39Y	Cluster_2	-0.327998	0.151456	0.194428	0.325872	-0.151495	0.0718458	0.100417	0.0847308	0.0099209	0.0653973	0.238451	0.272029	0.387054	-0.228924	0.370822	-0.00978067	-0.0981979	0.214577	0.479397	0.23414	0.0955445	-0.130974	0.347956
TCGA-DD-A39Z	Cluster_1	-0.274431	0.0699768	0.251099	0.297321	-0.162075	-0.0201376	0.0822932	0.0681604	-0.0310215	0.0479234	0.215907	0.263656	0.395548	-0.139411	0.303906	-0.0776214	-0.0820806	0.127804	0.466182	0.248684	0.0108153	-0.0782832	0.350164
TCGA-DD-A3A1	Cluster_2	-0.275459	0.146905	0.319811	0.316238	-0.0647633	0.154383	0.139597	0.112403	0.0226076	0.0220713	0.312715	0.293291	0.376879	-0.143142	0.363539	0.0495468	-0.0411444	0.391967	0.489655	0.303123	0.0898772	-0.00944009	0.357819
TCGA-DD-A3A2	Cluster_1	-0.20822	-0.0157968	0.242043	0.308768	-0.0646292	0.181126	0.102686	0.14365	-0.0777431	0.049539	0.175201	0.241774	0.362813	-0.141435	0.357128	0.0286467	-0.0887429	0.208843	0.500352	0.285705	0.0127971	-0.0569586	0.323594
TCGA-DD-A3A3	Cluster_1	-0.289096	0.0685803	0.240248	0.321627	-0.150624	0.0477442	0.102872	0.141978	0.0145288	0.0123792	0.255433	0.263337	0.390472	-0.167557	0.330842	0.020116	-0.0240095	0.251304	0.478306	0.212704	0.0679287	-0.0599637	0.324959
TCGA-DD-A3A4	Cluster_1	-0.331622	-0.0705242	0.153318	0.268467	-0.166154	0.0425337	0.0520142	0.0811252	0.0219826	0.034845	0.166092	0.270255	0.35972	-0.177264	0.327411	-0.0328723	-0.144396	0.0652372	0.51574	0.234509	0.0188712	-0.0892411	0.310395
TCGA-DD-A3A5	Cluster_1	-0.247448	0.0672153	0.265687	0.272831	-0.157083	0.0832521	0.048563	0.116508	-0.00345536	0.00810602	0.167406	0.261301	0.400968	-0.143994	0.280302	-0.0338866	-0.0966304	0.249414	0.50438	0.29855	0.024893	-0.163955	0.295926
TCGA-DD-A3A6	Cluster_1	-0.141572	0.0166358	0.407419	0.321744	-0.0678953	0.135717	0.223707	0.159118	-0.0930753	0.101597	0.225013	0.264088	0.389208	-0.0627164	0.321923	0.180112	0.192711	0.333209	0.435654	0.280963	0.13244	-0.184149	0.378299
TCGA-DD-A3A7	Cluster_1	-0.204534	0.129913	0.260463	0.297102	-0.1612	0.00102328	0.101568	0.0921475	-0.0425258	0.00851162	0.241122	0.312034	0.438839	-0.176959	0.309028	0.0194545	-0.0795735	0.295693	0.481226	0.251666	0.0396443	-0.0304667	0.33769
TCGA-DD-A3A8	Cluster_1	-0.26118	-0.0195777	0.204824	0.287978	-0.18897	0.0111657	0.110289	0.0964955	-0.0443512	0.0461408	0.191379	0.292532	0.373493	-0.143738	0.326755	-0.0616291	-0.0437801	0.137393	0.471819	0.227822	0.0249314	-0.190592	0.307618
TCGA-DD-A3A9	Cluster_1	-0.171764	0.0825585	0.32826	0.293899	-0.089472	0.0994646	0.143949	0.157376	-0.0942572	0.0364521	0.225247	0.291026	0.440915	-0.203172	0.323099	0.0464815	-0.0298514	0.356486	0.502689	0.268854	0.0524029	-0.0512869	0.353268
TCGA-DD-A4NA	Cluster_3	-0.242936	0.123391	0.201341	0.235807	0.00354287	0.234697	0.104482	0.0842906	-0.0156495	0.0481908	0.260227	0.239174	0.371152	-0.141826	0.362026	0.0484088	-0.0661813	0.330049	0.417903	0.335651	0.0554916	-0.0259534	0.366928
TCGA-DD-A4NB	Cluster_2	-0.234558	0.0877755	0.315233	0.276815	-0.076821	0.187542	0.146833	0.181265	-0.0311949	0.0846314	0.291992	0.283153	0.421459	-0.0616435	0.327659	0.0492728	0.0315112	0.317651	0.496323	0.3341	0.112718	-0.108829	0.378231
TCGA-DD-A4ND	Cluster_2	-0.178189	0.212647	0.296278	0.335485	-0.0140018	0.249105	0.17738	0.178292	-0.0155901	0.104463	0.284712	0.258388	0.402483	-0.0745212	0.365773	0.093403	0.0307518	0.371748	0.478082	0.383559	0.111719	-0.063582	0.368361
TCGA-DD-A4NE	Cluster_2	-0.359347	0.114371	0.0681656	0.246535	-0.213576	0.0443491	0.107814	0.0758703	-0.0596242	0.130903	0.22463	0.253251	0.412573	-0.225506	0.294435	0.0119548	-0.138016	0.124701	0.50106	0.287331	0.0305251	-0.0558938	0.35279
TCGA-DD-A4NF	Cluster_2	-0.318628	-0.0585833	0.17026	0.277499	-0.156345	0.0332687	0.137354	0.0849699	-0.0642261	0.0497641	0.22241	0.267723	0.348231	-0.0964074	0.339618	-0.0712034	-0.109097	0.0999254	0.457348	0.215247	0.0277977	-0.213977	0.326625
TCGA-DD-A4NG	Cluster_1	-0.221561	0.145607	0.286477	0.323236	-0.0967686	0.100063	0.15021	0.141086	-0.0323312	0.0844499	0.271866	0.262205	0.357107	-0.12019	0.321648	-0.000159644	-0.0705503	0.285767	0.474425	0.271115	0.0618887	-0.121521	0.329817
TCGA-DD-A4NH	Cluster_3	-0.219848	0.165849	0.216655	0.308427	-0.0756002	0.155752	0.179783	0.168109	-0.0540094	0.149422	0.369879	0.289681	0.388038	-0.17857	0.358256	0.104196	0.00348487	0.382194	0.488183	0.304879	0.0698599	0.164981	0.403976
TCGA-DD-A4NI	Cluster_1	-0.114926	0.0976636	0.333668	0.329306	0.0118655	0.214128	0.175487	0.184909	-0.00472536	0.0713699	0.260119	0.282288	0.394911	-0.0663164	0.356648	0.0818546	-0.0147795	0.323189	0.516391	0.331627	0.0861438	-0.104679	0.329777
TCGA-DD-A4NJ	Cluster_2	-0.206579	0.246295	0.208947	0.324131	-0.0113564	0.204225	0.151936	0.120318	-0.00126813	0.100759	0.297346	0.257209	0.405453	-0.0911363	0.372812	0.0744358	-0.0200141	0.361233	0.49016	0.311408	0.0982723	-0.121031	0.356145
TCGA-DD-A4NK	Cluster_2	-0.312237	-0.0449404	0.171849	0.319187	-0.135672	0.0801098	0.0887237	0.116422	-0.00802819	0.0346763	0.17779	0.240025	0.398357	-0.195956	0.314125	-0.00267865	-0.12952	0.192066	0.486964	0.309534	0.0172119	-0.133454	0.291135
TCGA-DD-A4NL	Cluster_1	-0.227576	0.038787	0.224991	0.311317	-0.109015	0.0953476	0.132397	0.159236	-0.00422713	0.11062	0.290401	0.279206	0.384609	-0.0873292	0.357086	0.0522914	-0.0126257	0.282455	0.491668	0.313579	0.0567228	0.00721233	0.363136
TCGA-DD-A4NN	Cluster_3	-0.293386	0.0620894	0.142717	0.320543	-0.175748	0.0216303	0.124653	0.0854762	-0.11045	0.0880219	0.19267	0.236952	0.33277	-0.243364	0.269356	0.00652829	-0.109985	0.201351	0.496186	0.250111	0.0155737	-0.179469	0.329708
TCGA-DD-A4NO	Cluster_1	-0.277232	0.0315418	0.212001	0.265842	-0.122372	0.0768502	0.111671	0.103837	0.00910492	0.0406104	0.240074	0.275868	0.395071	-0.168157	0.342827	0.0363898	-0.0566793	0.212702	0.472476	0.281482	0.0821637	-0.0748788	0.376137
TCGA-DD-A4NP	Cluster_1	-0.245879	-0.0919921	0.255525	0.294983	-0.108244	0.0746362	0.1067	0.123124	-0.0446737	0.0696352	0.246402	0.305163	0.33234	-0.124548	0.332854	0.0387657	0.069054	0.202975	0.48579	0.242066	0.017257	-0.140449	0.326042
TCGA-DD-A4NQ	Cluster_2	-0.307452	0.202152	0.197963	0.318001	-0.137567	0.171942	0.141829	0.142138	0.0685007	0.154626	0.327676	0.33048	0.404008	-0.173934	0.389083	0.0630898	-0.0532526	0.31159	0.523857	0.245973	0.106021	-0.0650618	0.34603
TCGA-DD-A4NR	Cluster_3	-0.112765	0.310751	0.486892	0.38514	0.0502548	0.294216	0.255903	0.200604	0.0253152	0.0770694	0.345168	0.27304	0.360281	-0.1124	0.375126	0.172917	0.0138802	0.511545	0.53186	0.351767	0.127254	-0.0531463	0.400951
TCGA-DD-A4NS	Cluster_2	-0.148855	0.109008	0.363474	0.323873	-0.0506263	0.235984	0.19278	0.203249	-0.00871391	0.101977	0.270931	0.258751	0.398946	-0.0328316	0.399184	0.0919369	0.0564214	0.391951	0.506843	0.356532	0.11822	-0.0843174	0.366022
TCGA-DD-A4NV	Cluster_2	-0.228262	0.0099819	0.212529	0.30195	-0.10963	0.172879	0.0928247	0.14166	-0.0162608	0.0417748	0.206943	0.247209	0.358264	-0.117862	0.340972	0.0123647	-0.0490832	0.249312	0.497608	0.2867	0.0505567	-0.0680332	0.357966
TCGA-DD-A73A	Cluster_2	-0.261906	0.124204	0.337184	0.288762	-0.0684269	0.0605997	0.103324	0.147614	0.019873	0.039428	0.297163	0.265761	0.396481	-0.105317	0.346165	0.029569	-0.0736733	0.326713	0.487751	0.287018	0.0702524	-0.0358253	0.360971
TCGA-DD-A73B	Cluster_2	-0.344529	0.0680937	0.169668	0.284448	-0.18695	0.0671431	0.0835448	0.105662	-0.0108024	0.0552428	0.200912	0.268174	0.405331	-0.188484	0.313469	0.00752848	-0.102492	0.18355	0.495225	0.273457	0.0393913	-0.0200502	0.301957
TCGA-DD-A73C	Cluster_2	-0.25726	-0.026268	0.268535	0.287217	-0.0695969	0.174426	0.132629	0.148143	-0.0871988	0.0788021	0.181345	0.220638	0.408291	-0.158521	0.346572	0.0386895	-0.0384888	0.187937	0.471775	0.308915	0.0595872	-0.0855206	0.365533
TCGA-DD-A73D	Cluster_2	-0.32546	-0.0525049	0.194959	0.313653	-0.144552	-0.0335216	0.10511	0.0613129	-0.0842739	0.0610064	0.181847	0.22851	0.35923	-0.138281	0.350578	-0.0990385	-0.158766	0.0832753	0.428266	0.217542	-0.00312789	-0.217714	0.249893
TCGA-DD-A73E	Cluster_2	-0.350478	-0.0507495	0.136723	0.306798	-0.185081	0.0187194	0.0973724	0.0661653	-0.0289726	0.0526509	0.127048	0.288783	0.346487	-0.110839	0.328496	-0.122078	0.0202161	0.0108884	0.434	0.228342	-0.00868434	-0.296975	0.322818
TCGA-DD-A73F	Cluster_2	-0.116833	0.262024	0.451658	0.362499	0.0269667	0.182304	0.179295	0.181514	0.0376621	0.116636	0.275936	0.278968	0.364171	-0.136982	0.361993	0.101083	0.00644424	0.408969	0.496567	0.346002	0.114626	-0.098258	0.34914
TCGA-DD-A73G	Cluster_1	-0.194609	0.0328812	0.252384	0.331459	-0.123672	0.117798	0.176687	0.103355	-0.0762859	-0.00319521	0.23396	0.267687	0.440086	-0.151183	0.309471	0.1127	0.0984924	0.327653	0.487048	0.216782	0.0338436	-0.0862667	0.339028
TCGA-DD-AA3A	Cluster_3	-0.247122	0.125483	0.171714	0.255711	-0.16578	-0.0240972	0.0846137	0.0888107	0.0583995	0.00899658	0.284018	0.246426	0.372269	-0.166002	0.338181	-0.0435631	-0.0936382	0.155121	0.430129	0.247491	0.0286709	-0.274332	0.33623
TCGA-DD-AAC8	Cluster_2	-0.229686	0.0440718	0.224067	0.316212	-0.104517	0.131099	0.166744	0.111142	-0.0705795	0.0428953	0.266839	0.251071	0.351761	-0.200333	0.309906	-0.000641812	-0.12746	0.256	0.463499	0.214929	0.101675	-0.184134	0.354909
TCGA-DD-AAC9	Cluster_1	-0.0130491	0.110412	0.342165	0.321877	-0.00165845	0.204601	0.151776	0.175475	-0.0184427	0.0592676	0.295317	0.29978	0.415049	-0.141977	0.364412	0.118782	-0.00213483	0.378321	0.485492	0.333298	0.114518	-0.0246434	0.383081
TCGA-DD-AACA	Cluster_2	-0.219734	0.0800702	0.206033	0.300605	-0.125307	0.0439041	0.118103	0.0816557	-0.0417775	0.0808889	0.207628	0.254023	0.341331	-0.140366	0.325465	-0.0581906	-0.158774	0.126359	0.495042	0.246941	0.0369071	-0.243051	0.296353
TCGA-DD-AACB	Cluster_2	-0.00605695	0.181266	0.428086	0.374258	0.0264594	0.191417	0.217938	0.146844	-0.0512958	0.105652	0.23652	0.30318	0.367075	-0.201849	0.338474	0.0404091	0.0103933	0.375144	0.502267	0.272942	0.10144	-0.213979	0.349965
TCGA-DD-AACC	Cluster_1	0.202149	0.349823	0.540992	0.367839	0.197284	0.314893	0.291589	0.225882	-0.0118571	0.109162	0.338043	0.287514	0.343364	-0.0423825	0.390464	0.194323	0.107667	0.544586	0.56076	0.35943	0.154375	-0.0374683	0.393678
TCGA-DD-AACD	Cluster_1	-0.152875	0.0986817	0.338578	0.3517	-0.0757807	0.125289	0.147161	0.149368	-0.0228813	0.0441975	0.275589	0.281944	0.387902	-0.166077	0.342343	0.0684768	-0.014225	0.349054	0.473072	0.266875	0.0935871	-0.0559697	0.340521
TCGA-DD-AACE	Cluster_2	-0.223439	0.0163503	0.180318	0.309912	-0.0940734	0.0859403	0.0951431	0.0857193	-0.0551635	0.0113004	0.211411	0.274366	0.36061	-0.129756	0.363239	-0.0196835	-0.110173	0.167518	0.468983	0.289119	0.0233412	-0.15268	0.302652
TCGA-DD-AACF	Cluster_1	-0.240551	0.155106	0.257193	0.352235	-0.0492953	0.160735	0.122489	0.14042	0.0331605	0.0831189	0.29096	0.284271	0.416214	-0.159866	0.311234	0.0726417	-0.0595941	0.320232	0.489672	0.304691	0.0783458	-0.0652994	0.338976
TCGA-DD-AACG	Cluster_1	-0.221048	0.156994	0.267093	0.368878	-0.076109	0.105467	0.145902	0.0991004	0.0126963	0.0909684	0.274568	0.283233	0.339481	-0.176109	0.34617	0.0648296	-0.0121108	0.329522	0.534216	0.229936	0.0942054	-0.105687	0.346904
TCGA-DD-AACH	Cluster_3	-0.267704	0.213955	0.200703	0.272829	-0.111204	0.0963999	0.176458	0.0586752	-0.0105484	0.139747	0.298244	0.313586	0.413824	-0.170826	0.34819	0.0140117	-0.0713528	0.230865	0.458211	0.310004	0.117097	-0.0685615	0.367904
TCGA-DD-AACI	Cluster_1	-0.0698451	0.20318	0.47846	0.323852	0.0161767	0.210379	0.203594	0.17441	0.054297	0.0636542	0.339255	0.293256	0.447806	-0.0971136	0.32969	0.147135	0.0384927	0.466081	0.497259	0.331471	0.147848	0.0815239	0.363179
TCGA-DD-AACJ	Cluster_2	-0.311825	-0.0188468	0.219052	0.320042	-0.149972	0.0743486	0.10332	0.0731687	-0.00166574	-0.0344428	0.236111	0.250379	0.403181	-0.146103	0.345193	-0.0187576	-0.104019	0.246987	0.452425	0.226023	0.0289772	-0.105699	0.320037
TCGA-DD-AACK	Cluster_2	-0.300618	0.123815	0.224111	0.296104	-0.103707	0.0670573	0.0882305	0.11306	-0.0258048	0.0649559	0.265183	0.277356	0.378356	-0.113703	0.345494	-0.0221472	-0.122188	0.216095	0.503627	0.252665	0.039276	-0.0904464	0.336492
TCGA-DD-AACL	Cluster_3	-0.0726043	0.248933	0.381858	0.396131	0.0710494	0.287807	0.197116	0.155939	0.0204503	0.111275	0.349397	0.310977	0.354137	-0.11659	0.39918	0.143384	0.137261	0.493303	0.522969	0.274579	0.11143	0.0341483	0.383932
TCGA-DD-AACN	Cluster_2	-0.153185	0.128708	0.24137	0.286479	-0.0809254	0.104196	0.148646	0.133153	-0.0529868	0.039889	0.242907	0.224427	0.386094	-0.150563	0.293081	0.0195855	-0.0401203	0.249851	0.464869	0.305339	0.0834301	-0.134803	0.373972
TCGA-DD-AACO	Cluster_1	-0.16475	0.0531844	0.317867	0.317916	-0.109049	0.0940825	0.115039	0.148771	0.0199638	0.0562925	0.291429	0.308903	0.393436	-0.0896851	0.340552	0.0997194	0.0280529	0.359756	0.518331	0.293722	0.093873	-0.0532548	0.340504
TCGA-DD-AACP	Cluster_3	-0.27137	0.165674	0.204439	0.327734	-0.163475	0.0233112	0.0999085	0.0873243	-0.095322	0.12261	0.216963	0.248784	0.333728	-0.214143	0.310651	-0.0556384	-0.0859545	0.192461	0.480702	0.153794	0.0541902	-0.189573	0.331811
TCGA-DD-AACQ	Cluster_2	-0.288426	0.00328223	0.133576	0.284394	-0.207704	-0.0702917	0.0475008	0.0703262	0.0467016	0.0122824	0.234232	0.288889	0.409274	-0.203583	0.324899	-0.0270918	-0.211337	0.133959	0.475509	0.262958	0.0392688	-0.0636561	0.295625
TCGA-DD-AACS	Cluster_2	-0.323222	0.102964	0.138579	0.253216	-0.150347	-0.000495422	0.0660769	0.100721	0.00883968	0.0586197	0.234539	0.2902	0.369557	-0.167709	0.325242	-0.00759375	-0.124979	0.171608	0.489811	0.297566	0.0719785	-0.0750267	0.271426
TCGA-DD-AACT	Cluster_1	-0.123662	0.143856	0.338576	0.325252	-0.0583517	0.14546	0.148663	0.160362	-0.0298775	0.0570602	0.306172	0.27473	0.364062	-0.239734	0.313452	0.0844781	-0.0492537	0.336382	0.571211	0.30077	0.0831103	0.0573562	0.325743
TCGA-DD-AACU	Cluster_2	-0.203064	0.0741065	0.253723	0.307916	-0.0934916	0.0839917	0.11875	0.128598	0.0332725	0.0361852	0.264155	0.266356	0.393279	-0.158802	0.325644	0.00503597	-0.0594787	0.24645	0.547717	0.298	0.0400849	-0.137839	0.367192
TCGA-DD-AACV	Cluster_2	-0.364231	0.107745	0.12918	0.289077	-0.179236	0.0622526	0.0428087	0.0526966	0.0241168	0.062532	0.167126	0.222213	0.381447	-0.174766	0.265359	-0.00169792	-0.186125	0.135224	0.458642	0.262019	0.0355264	-0.185517	0.275929
TCGA-DD-AACW	Cluster_2	-0.235417	0.128265	0.237835	0.329694	-0.0835714	7.32927e-05	0.121129	0.095342	-0.0579141	0.111462	0.24235	0.26616	0.280243	-0.222478	0.315343	0.0381074	-0.0530391	0.191349	0.521368	0.227943	0.0323475	-0.148416	0.308236
TCGA-DD-AACX	Cluster_2	-0.239343	0.105076	0.207821	0.283826	-0.0475929	0.0968818	0.0895805	0.119582	-0.0409488	0.0116823	0.261527	0.25629	0.391934	-0.14002	0.342487	0.00260526	-0.0975834	0.204339	0.487823	0.220122	0.0150904	-0.190507	0.316794
TCGA-DD-AACY	Cluster_1	-0.245901	0.0951067	0.249148	0.249546	-0.0838511	0.0448719	0.115964	0.106245	-0.0475466	0.066936	0.318767	0.284363	0.436279	-0.0932245	0.318682	0.017595	-0.0891521	0.231825	0.469674	0.30468	0.0379796	-0.00747444	0.376754
TCGA-DD-AACZ	Cluster_2	-0.047185	0.30964	0.405133	0.363218	0.117512	0.32513	0.250234	0.148405	-0.00999832	0.0777507	0.320546	0.294171	0.348945	-0.0794697	0.433315	0.182352	0.246501	0.464376	0.511193	0.293886	0.151848	-0.0790992	0.386571
TCGA-DD-AAD0	Cluster_2	-0.298766	0.0427779	0.194416	0.363261	-0.137801	0.0910793	0.110616	0.0921782	-0.0477407	0.0806236	0.254366	0.240192	0.358429	-0.198512	0.350363	-0.0676608	-0.159035	0.1621	0.462541	0.220916	0.0176658	-0.276014	0.244906
TCGA-DD-AAD1	Cluster_2	0.0476236	0.211835	0.346784	0.292037	0.0970639	0.205633	0.226909	0.193126	-0.02116	0.0500886	0.272632	0.251323	0.41576	-0.0928808	0.321793	0.0467793	0.0383188	0.349685	0.487933	0.354889	0.12856	-0.0295228	0.397681
TCGA-DD-AAD2	Cluster_2	-0.203496	0.190617	0.306687	0.324061	-0.0342061	0.210404	0.183581	0.184758	0.0124859	0.0844053	0.308312	0.265564	0.402236	-0.0851551	0.366892	0.103517	0.0219263	0.371312	0.468254	0.348673	0.127656	-0.0425352	0.402032
TCGA-DD-AAD3	Cluster_2	-0.186002	0.114823	0.259164	0.31531	-0.0596532	0.130812	0.152488	0.165233	-0.015227	0.0683619	0.274896	0.275048	0.419449	-0.102908	0.337447	0.0462789	0.0101889	0.284107	0.500522	0.342518	0.0934283	-0.0698617	0.366281
TCGA-DD-AAD5	Cluster_3	-0.265478	0.122413	0.176642	0.333323	-0.105322	0.192852	0.165182	0.0797616	0.0137945	0.0813991	0.31435	0.282392	0.393379	-0.164938	0.314375	0.136582	-0.059948	0.373255	0.465149	0.253157	0.140119	-0.143441	0.370436
TCGA-DD-AAD6	Cluster_2	-0.33437	0.160847	0.190478	0.297129	-0.151545	0.0295454	0.133998	0.0733368	-0.000903751	0.075917	0.210477	0.272633	0.345337	-0.159779	0.340955	-0.0222213	-0.131203	0.222867	0.507021	0.168643	0.0510276	-0.210278	0.299867
TCGA-DD-AAD8	Cluster_2	-0.247017	0.150017	0.22843	0.315049	-0.135734	0.0427365	0.0763466	0.113676	0.017556	0.0339568	0.23063	0.25825	0.407096	-0.109989	0.335543	0.0429624	-0.0978113	0.225957	0.475709	0.282282	0.0463584	-0.0915673	0.341812
TCGA-DD-AADA	Cluster_1	-0.0559192	0.115115	0.3568	0.290322	0.000824686	0.105861	0.125336	0.156309	-0.0748489	0.000886425	0.274588	0.292886	0.389933	-0.144386	0.310398	0.0873639	-0.0463978	0.294644	0.491423	0.300507	0.0514915	-0.0663926	0.351207
TCGA-DD-AADB	Cluster_3	-0.0221134	0.268924	0.383023	0.328927	0.0873124	0.14142	0.171922	0.137623	-0.0312127	0.114647	0.281475	0.278628	0.347133	-0.223029	0.350644	0.0584401	-0.0431389	0.359629	0.506079	0.267401	0.0804413	-0.0390136	0.351709
TCGA-DD-AADC	Cluster_3	-0.293457	0.209867	0.187569	0.285787	-0.128352	0.0565035	0.117686	0.0875509	-0.0535833	0.130261	0.209968	0.260424	0.369107	-0.169124	0.33451	-0.0203097	-0.0875103	0.208266	0.463702	0.23577	0.0425859	-0.279658	0.34121
TCGA-DD-AADD	Cluster_3	-0.289167	0.131049	0.239569	0.358891	-0.110744	0.0255057	0.101353	0.070612	-0.0658298	0.0820544	0.210203	0.238919	0.309112	-0.196553	0.335014	-0.0331061	-0.0917996	0.185305	0.493257	0.20371	0.0542911	-0.251318	0.255884
TCGA-DD-AADF	Cluster_2	-0.147439	0.12137	0.298216	0.308233	-0.0686446	0.0552559	0.0774168	0.0725917	-0.0344249	0.057057	0.229041	0.29327	0.372001	-0.158252	0.30681	0.0227108	-0.115573	0.285036	0.491967	0.27431	0.034198	-0.118198	0.312832
TCGA-DD-AADG	Cluster_2	-0.323297	-0.0469502	0.217039	0.296344	-0.162419	0.0050706	0.0802399	0.0893778	-0.0420901	0.0428118	0.152623	0.258919	0.370854	-0.121541	0.303407	-0.0796072	-0.111875	0.0702785	0.455637	0.237927	0.0180956	-0.213573	0.305658
TCGA-DD-AADI	Cluster_1	-0.0186137	0.188687	0.432371	0.327332	0.0198604	0.179392	0.199558	0.168529	-0.0684456	0.0545229	0.294553	0.253716	0.379737	-0.115116	0.321562	0.0780851	0.0448574	0.37449	0.531706	0.327095	0.0845102	-0.0709243	0.374906
TCGA-DD-AADJ	Cluster_1	-0.212944	0.105213	0.276004	0.280568	-0.0929388	0.0136162	0.11906	0.097417	-0.077671	0.0637231	0.234264	0.287558	0.360174	-0.17899	0.312936	0.0216391	-0.0480348	0.252999	0.518584	0.273834	0.0246002	-0.0175672	0.349227
TCGA-DD-AADK	Cluster_1	-0.0147173	0.117254	0.302518	0.288122	-0.0109229	0.12207	0.166444	0.17884	-0.0159718	0.00245706	0.276355	0.289161	0.436407	-0.186065	0.326927	0.0980844	-0.061261	0.305812	0.489427	0.307122	0.133616	-0.0763911	0.377464
TCGA-DD-AADL	Cluster_2	-0.290919	0.0377817	0.152601	0.279583	-0.167703	0.0201131	0.040861	0.0707905	0.00618639	0.0597345	0.203557	0.282795	0.390077	-0.252605	0.339872	-0.00477214	-0.137768	0.129057	0.550289	0.296741	0.0569182	-0.0751816	0.311858
TCGA-DD-AADM	Cluster_1	-0.194082	0.11369	0.277967	0.307153	-0.133608	0.0912547	0.107478	0.115023	0.0302174	0.0477785	0.28561	0.290337	0.400338	-0.177976	0.331999	0.0444023	-0.0466367	0.297291	0.484335	0.290077	0.0861082	-0.0816807	0.330269
TCGA-DD-AADN	Cluster_2	0.0141852	0.255886	0.50772	0.336129	0.0625904	0.200761	0.170881	0.144982	0.0548289	0.0942227	0.278514	0.311408	0.380304	-0.162675	0.372094	0.0814278	0.0309201	0.45563	0.53523	0.265155	0.091889	-0.0955058	0.343439
TCGA-DD-AADO	Cluster_1	-0.0421953	0.22024	0.421197	0.350542	0.022437	0.190368	0.186594	0.159282	-0.0245021	0.0646798	0.321325	0.245198	0.377986	-0.133673	0.324954	0.0578706	0.0643093	0.397698	0.520961	0.258217	0.0767827	-0.0523416	0.340787
TCGA-DD-AADP	Cluster_2	-0.146469	0.142359	0.24861	0.277447	-0.063308	0.0731568	0.112792	0.130437	0.0137971	0.07563	0.265562	0.267479	0.384836	-0.165244	0.357294	0.0412601	-0.0795666	0.255626	0.471072	0.322856	0.0734779	-0.0705226	0.357595
TCGA-DD-AADQ	Cluster_1	-0.274856	0.104542	0.309667	0.330139	-0.0971583	0.0337751	0.0867325	0.104353	-0.010158	0.0673683	0.28228	0.27795	0.334322	-0.2215	0.311192	-0.0274802	-0.10058	0.244215	0.469914	0.282394	0.049641	0.0248835	0.363459
TCGA-DD-AADR	Cluster_2	-0.237097	0.177146	0.340854	0.341072	-0.1005	0.0677761	0.0883699	0.129671	0.0576767	0.118378	0.243838	0.299004	0.378241	-0.143225	0.340383	0.029849	-0.0655872	0.242499	0.491649	0.283318	0.0929825	-0.126167	0.294883
TCGA-DD-AADS	Cluster_1	-0.11743	0.060282	0.425891	0.352507	-0.0469971	0.169822	0.154146	0.167222	0.0171253	0.0458625	0.223025	0.27679	0.389589	-0.0665407	0.339884	0.0938289	-0.00300676	0.368003	0.502888	0.285789	0.0541551	-0.0545316	0.327893
TCGA-DD-AADU	Cluster_1	-0.318545	0.0132441	0.230459	0.301983	-0.143087	0.0208626	0.170686	0.0767571	-0.00720183	-0.00847204	0.238332	0.263274	0.390501	-0.0164165	0.318773	-0.0524236	-0.0221796	0.193314	0.47309	0.195059	0.0682688	-0.208605	0.312733
TCGA-DD-AADV	Cluster_2	-0.253095	0.0821598	0.204051	0.306661	-0.110163	0.14805	0.0894823	0.118289	-0.00944535	0.060929	0.232436	0.275484	0.406124	-0.191769	0.325255	0.0265473	-0.0806711	0.245004	0.490702	0.319887	0.0751194	-0.118985	0.335426
TCGA-DD-AADW	Cluster_3	-0.24802	0.188712	0.135602	0.280783	-0.129103	0.0134329	0.102835	0.0853295	-0.0857286	0.119268	0.231428	0.221023	0.363904	-0.244259	0.294515	-0.01174	-0.0537326	0.157176	0.470322	0.283468	0.062791	-0.187134	0.34131
TCGA-DD-AADY	Cluster_2	-0.296483	0.048325	0.187239	0.27301	-0.140072	0.00972519	0.08809	0.077209	-0.0434607	0.133479	0.242056	0.250347	0.401942	-0.156175	0.291149	-0.0130157	-0.1695	0.109234	0.499246	0.323474	0.0173925	-0.0486765	0.314708
TCGA-DD-AAE0	Cluster_3	-0.197863	0.151663	0.250996	0.292454	-0.162065	0.0540652	0.148836	0.0965459	-0.041671	0.0261139	0.21256	0.245656	0.376632	-0.232189	0.280426	-0.0184209	-0.0949741	0.237965	0.494833	0.292688	0.0374794	-0.217192	0.349366
TCGA-DD-AAE1	Cluster_1	-0.211709	0.104125	0.220283	0.322086	-0.0173319	0.0268582	0.120581	0.0793924	-0.0801852	0.0726425	0.261902	0.266059	0.322668	-0.223373	0.316906	-0.0102874	-0.0394855	0.221634	0.493106	0.248098	0.0309407	-0.139678	0.3131
TCGA-DD-AAE2	Cluster_2	-0.11887	0.122051	0.317823	0.332852	-0.0236541	0.182081	0.160131	0.154122	0.0324101	0.0375604	0.241602	0.275264	0.413942	-0.154935	0.340861	0.0742884	-0.0474915	0.335302	0.533191	0.342086	0.0624375	-0.0531353	0.33483
TCGA-DD-AAE3	Cluster_1	-0.282165	-0.0530014	0.244716	0.368417	-0.0992247	0.10211	0.145989	0.121855	-0.0215027	0.00324791	0.229899	0.270932	0.42323	-0.0363429	0.345657	0.0840327	-0.0254684	0.274084	0.492629	0.278264	0.0624583	-0.108995	0.326712
TCGA-DD-AAE4	Cluster_1	-0.0474309	0.209292	0.455019	0.378852	0.0248941	0.250378	0.175686	0.199499	-0.0255214	0.0930971	0.265799	0.302067	0.415751	-0.103647	0.351283	0.127204	0.11397	0.412974	0.526321	0.317458	0.0946297	-0.062498	0.348154
TCGA-DD-AAE6	Cluster_2	-0.327452	0.0549374	0.10582	0.238428	-0.235519	-0.0807263	0.0117662	0.0394298	-0.00614891	0.0312577	0.144911	0.241931	0.394138	-0.215715	0.301753	-0.0263898	-0.177879	0.123549	0.463201	0.242989	-0.00338319	-0.113772	0.26538
TCGA-DD-AAE7	Cluster_1	-0.133375	0.0881754	0.338657	0.294752	-0.0473722	0.18651	0.160556	0.15716	-0.0192847	0.0374836	0.263538	0.306062	0.418913	-0.118726	0.34842	0.0446452	-0.044813	0.322775	0.494927	0.320407	0.0950049	-0.0967417	0.346983
TCGA-DD-AAE9	Cluster_1	-0.343131	0.0182649	0.205835	0.335521	-0.145925	0.000392338	0.0776305	0.108884	-0.0409325	0.0600399	0.216992	0.282233	0.338642	-0.165204	0.308326	-0.0631755	-0.075856	0.137194	0.464575	0.19043	0.0633988	-0.217792	0.277356
TCGA-DD-AAEA	Cluster_2	-0.166642	0.188065	0.348605	0.351154	-0.0548838	0.0581866	0.112923	0.147525	-0.0160743	0.0811344	0.264565	0.284019	0.404329	-0.143488	0.334811	0.0177042	-0.0313858	0.258553	0.493437	0.26962	0.0622889	-0.116961	0.294322
TCGA-DD-AAEB	Cluster_1	-0.266731	-0.0119385	0.303954	0.328749	-0.130749	0.0480186	0.121088	0.135658	-0.0577238	0.0444704	0.198182	0.30463	0.395128	-0.0359163	0.321753	-0.0307236	-0.0666271	0.205503	0.474854	0.215548	0.0393615	-0.173804	0.310286
TCGA-DD-AAED	Cluster_1	-0.220111	0.0867914	0.210447	0.282149	-0.0702295	0.0149179	0.133456	0.102051	0.010982	0.0798394	0.23584	0.283983	0.404141	-0.0693099	0.34451	0.0194793	-0.116158	0.216957	0.48475	0.240694	0.0241401	-0.0328114	0.351183
TCGA-DD-AAEE	Cluster_2	-0.290728	0.0657093	0.202886	0.301449	-0.180749	0.00181945	0.0929955	0.0814618	-0.0449713	0.0642573	0.211063	0.282889	0.388282	-0.216565	0.336022	-0.056005	-0.192056	0.133445	0.466304	0.248141	0.0252372	-0.181219	0.344876
TCGA-DD-AAEG	Cluster_2	-0.29571	0.028445	0.144329	0.275726	-0.21696	-0.0218546	0.0870538	0.0955718	0.00339671	0.0671739	0.229685	0.308629	0.395127	-0.196457	0.301176	0.0122195	-0.109975	0.171837	0.466221	0.275354	0.0301552	-0.0255306	0.348203
TCGA-DD-AAEH	Cluster_1	-0.0638484	0.159536	0.490981	0.341699	-0.0128655	0.152858	0.199797	0.187386	-0.0260003	0.106823	0.257328	0.285264	0.41573	-0.144854	0.33646	0.0510313	0.00311519	0.339922	0.485064	0.363764	0.106694	-0.0769695	0.318816
TCGA-DD-AAEI	Cluster_2	-0.253215	0.141941	0.277979	0.329228	-0.0384333	0.139761	0.141056	0.125925	-0.00709643	0.0834752	0.286888	0.272252	0.384005	-0.108232	0.345237	0.0665367	-0.0568441	0.331451	0.521678	0.286678	0.110354	-0.104739	0.328609
TCGA-DD-AAEK	Cluster_2	-0.0026026	0.21407	0.388701	0.342647	0.0696975	0.177763	0.212313	0.202864	-0.0255573	0.121433	0.258542	0.287348	0.407682	-0.128786	0.338096	0.0967539	-0.0545964	0.387275	0.498382	0.29514	0.0858672	-0.166316	0.349277
TCGA-DD-AAVP	Cluster_1	-0.238407	0.00411386	0.248986	0.290748	-0.151498	0.0853832	0.159801	0.114821	-0.0717272	0.0499186	0.216726	0.344972	0.411756	-0.146549	0.299652	0.0136175	-0.027004	0.20347	0.444631	0.217725	0.00901603	-0.148943	0.312919
TCGA-DD-AAVQ	Cluster_2	0.195942	0.305873	0.484046	0.349857	0.15789	0.180485	0.221576	0.189395	-0.0302307	0.117046	0.312113	0.27715	0.374645	-0.098142	0.299691	0.09722	0.151828	0.443928	0.542262	0.29259	0.102144	-0.139069	0.356411
TCGA-DD-AAVR	Cluster_1	-0.0396511	0.214926	0.383432	0.358074	0.0616363	0.234167	0.215309	0.199748	-0.0232453	0.0560385	0.305885	0.294191	0.425236	-0.0713217	0.377695	0.13991	0.078816	0.434497	0.510123	0.352326	0.119747	0.0473421	0.367876
TCGA-DD-AAVS	Cluster_3	-0.208103	0.164883	0.276452	0.32349	-0.104899	0.0317634	0.0766875	0.0903526	-0.0143082	0.0666195	0.252241	0.228681	0.375469	-0.193734	0.323562	0.0367226	-0.103944	0.223413	0.509594	0.293549	0.0792961	-0.096546	0.337433
TCGA-DD-AAVU	Cluster_1	-0.265953	0.00169095	0.234462	0.332455	-0.161135	0.0699214	0.0901184	0.0698484	-0.0233712	0.0108753	0.209392	0.268213	0.409103	-0.157791	0.330415	0.0284725	-0.101922	0.171685	0.455725	0.209341	0.0662465	-0.0950546	0.321689
TCGA-DD-AAVV	Cluster_2	-0.0519187	0.199464	0.339471	0.350016	0.00416564	0.226748	0.21318	0.188894	-0.00515773	0.0938812	0.314981	0.290974	0.417178	-0.123767	0.333055	0.114082	0.0214653	0.402729	0.50179	0.335631	0.134147	-0.0116004	0.386068
TCGA-DD-AAVW	Cluster_2	-0.166352	0.132536	0.274673	0.302244	-0.0179699	0.161064	0.168614	0.158945	0.01033	0.0386316	0.275878	0.270912	0.423529	-0.133751	0.323131	0.0631546	-0.0108817	0.28775	0.516398	0.336781	0.102663	-0.0680724	0.347859
TCGA-DD-AAVX	Cluster_1	-0.144837	0.096856	0.332806	0.35026	-0.0405805	0.116529	0.162842	0.14525	0.0412879	0.0794175	0.280344	0.27748	0.375629	-0.128738	0.343017	0.0506377	-0.0712091	0.335681	0.495826	0.281499	0.0683259	-0.0886877	0.324249
TCGA-DD-AAVY	Cluster_2	-0.28662	-0.0645388	0.18887	0.291598	-0.133305	0.0573819	0.10184	0.0983902	-0.077324	0.0345202	0.183122	0.246795	0.373186	-0.14048	0.318528	-0.0745546	-0.222602	0.126886	0.439386	0.2477	0.029327	-0.129445	0.278955
TCGA-DD-AAVZ	Cluster_2	-0.206351	0.107067	0.202568	0.303121	-0.0734976	6.39655e-05	0.104641	0.110194	-0.0462426	0.0979738	0.250469	0.251484	0.386756	-0.197584	0.306317	0.0326137	-0.116422	0.195233	0.464274	0.26647	0.0310258	-0.112957	0.343514
TCGA-DD-AAW0	Cluster_2	-0.156039	0.113148	0.298296	0.326216	-0.0374144	0.209382	0.17482	0.188318	0.0269825	0.0405334	0.305396	0.262345	0.418577	-0.133891	0.365678	0.103437	0.0144379	0.374357	0.541275	0.304252	0.12522	-0.084708	0.341885
TCGA-DD-AAW1	Cluster_1	-0.26642	-0.0280612	0.179282	0.278698	-0.139254	0.0269579	0.112163	0.112145	-0.0131265	0.0444442	0.224763	0.270904	0.365554	-0.0957013	0.323632	-0.0680665	-0.0987227	0.138869	0.454397	0.247281	0.0293349	-0.213261	0.307429
TCGA-DD-AAW2	Cluster_1	-0.276492	0.0106583	0.200996	0.304261	-0.134708	0.024444	0.111103	0.114679	-0.0617807	0.0722812	0.178089	0.248136	0.37707	-0.122273	0.331521	-0.088272	-0.129915	0.152787	0.454702	0.275258	0.0224074	-0.224555	0.295762
TCGA-DD-AAW3	Cluster_2	-0.273345	-0.0228558	0.180256	0.310437	-0.139574	0.0276587	0.0912256	0.101205	-0.0557666	0.0483291	0.192026	0.237546	0.368396	-0.136007	0.339761	-0.0455737	-0.111057	0.142961	0.458266	0.266367	0.0167688	-0.200041	0.307505
TCGA-ED-A459	Cluster_2	-0.217883	0.155432	0.136156	0.285399	-0.10267	0.101957	0.142236	0.129538	0.0586337	0.0936795	0.31573	0.284476	0.376411	-0.153941	0.352653	0.0387714	-0.0165552	0.3476	0.479634	0.268227	0.0839849	-0.0611077	0.343121
TCGA-ED-A4XI	Cluster_1	-0.171964	0.058539	0.310295	0.296814	0.00111347	0.245975	0.188002	0.17323	-0.00377766	0.0559804	0.286441	0.26768	0.401001	-0.144809	0.374901	0.117922	-0.00241283	0.390182	0.527822	0.357445	0.0859029	-0.0668991	0.354612
TCGA-ED-A5KG	Cluster_3	0.452259	0.4241	0.580807	0.361885	0.486237	0.327408	0.308743	0.265165	-0.0336339	0.150066	0.311983	0.275509	0.376149	-0.0427808	0.318283	0.124253	0.0434538	0.520543	0.542205	0.395569	0.155353	-0.172216	0.418488
TCGA-ED-A627	Cluster_2	-0.0410194	0.218156	0.446613	0.336594	0.0422783	0.307943	0.222607	0.253245	-0.00976484	0.119933	0.297382	0.266537	0.397303	-0.00834364	0.419367	0.140125	0.120504	0.468377	0.543341	0.380943	0.144767	-0.0458376	0.372504
TCGA-ED-A66X	Cluster_3	-0.187093	0.157599	0.23613	0.336969	-0.0489698	0.195444	0.191697	0.137221	-0.051756	0.0335384	0.293939	0.232637	0.389024	-0.190841	0.363048	0.127169	-0.0206171	0.354038	0.524375	0.285694	0.107818	-0.116841	0.37632
TCGA-ED-A66Y	Cluster_3	-0.249326	0.0921174	0.113006	0.233057	-0.182084	-0.0663006	0.109344	0.0212147	-0.107411	0.0414274	0.172843	0.201179	0.411439	-0.296576	0.243333	-0.0830732	-0.135837	0.149283	0.531156	0.247282	0.0441035	-0.0671271	0.333966
TCGA-ED-A7PX	Cluster_3	-0.235309	0.0876033	0.201553	0.267984	-0.0955456	0.0915762	0.145037	0.103254	-0.0154948	0.0480829	0.280172	0.263023	0.430576	-0.224388	0.329461	-0.00183676	-0.0868377	0.258838	0.493984	0.308504	0.0810424	-0.200502	0.362533
TCGA-ED-A7PY	Cluster_1	-0.241911	0.0776837	0.225985	0.271681	-0.130776	-0.0467317	0.0818181	0.0794334	-0.0506617	0.0401224	0.241372	0.241424	0.349049	-0.200777	0.289147	0.021832	-0.154897	0.153923	0.456156	0.232461	-0.014409	-0.103039	0.328741
TCGA-ED-A7PZ	Cluster_2	-0.295385	0.0348832	0.152728	0.301137	-0.214429	0.0114476	0.0637352	0.036465	-0.0428988	0.0716918	0.185576	0.28013	0.392856	-0.2124	0.318391	-0.0327091	-0.144385	0.155862	0.473712	0.177866	0.029927	-0.200195	0.312454
TCGA-ED-A7XO	Cluster_2	-0.139954	0.18991	0.271981	0.281845	-0.0490207	0.268634	0.142884	0.150702	-0.00265422	0.105395	0.252086	0.278888	0.41861	-0.0354979	0.359366	0.0938038	0.0225366	0.376296	0.523364	0.333513	0.093662	-0.0781417	0.318203
TCGA-ED-A7XP	Cluster_2	-0.23461	0.120865	0.221258	0.323352	-0.0536301	0.119049	0.135931	0.137142	-0.0237223	0.0677391	0.273988	0.287578	0.404844	-0.170125	0.343965	0.0279899	-0.0452115	0.252541	0.518642	0.280138	0.0822142	-0.0802087	0.364722
TCGA-ED-A82E	Cluster_3	-0.241975	-0.00918317	0.150341	0.196944	-0.112389	0.088965	0.130396	0.0975091	-0.0518567	-0.0488555	0.250156	0.258874	0.355674	-0.179921	0.316896	-0.0384732	-0.110583	0.27141	0.370413	0.296745	0.0565304	-0.274248	0.379176
TCGA-ED-A8O5	Cluster_1	-0.233304	0.110219	0.228462	0.324268	-0.139516	0.0131705	0.129932	0.0600478	-0.0686371	0.116371	0.184401	0.246418	0.321582	-0.152059	0.27467	-0.0419918	-0.0518638	0.164926	0.478456	0.285529	0.0271999	-0.0746539	0.322233
TCGA-ED-A8O6	Cluster_3	-0.281952	0.109539	0.228406	0.292503	-0.140882	0.0445696	0.126764	0.0852948	-0.0511668	0.0166242	0.266961	0.24966	0.360594	-0.24111	0.343142	-0.0182169	-0.0982788	0.256404	0.483255	0.246632	0.0742985	-0.16932	0.329654
TCGA-ED-A97K	Cluster_3	-0.173439	0.0732699	0.190293	0.312598	-0.0716658	0.158956	0.159896	0.185912	0.11333	0.105744	0.269323	0.256777	0.380943	-0.238469	0.366863	0.040973	0.00183554	0.342181	0.470724	0.295767	0.0997066	-0.101316	0.373843
TCGA-EP-A12J	Cluster_2	-0.248492	0.0257575	0.199414	0.298451	-0.0922001	0.0480094	0.111296	0.104718	-0.0230035	0.106933	0.199421	0.286061	0.351452	-0.162184	0.322519	-0.0410132	-0.178214	0.175639	0.459898	0.264368	0.0178749	-0.191754	0.301434
TCGA-EP-A26S	Cluster_2	-0.300964	-0.0205458	0.203451	0.307605	-0.147049	0.0347633	0.100373	0.122464	-0.0643017	0.0592857	0.198606	0.258049	0.357423	-0.174397	0.321674	-0.046422	-0.0782032	0.131926	0.478721	0.238409	0.0317287	-0.244447	0.330139
TCGA-EP-A2KA	Cluster_1	-0.116587	0.290834	0.409345	0.334434	-0.0167883	0.180595	0.165437	0.139005	0.044726	0.138963	0.333645	0.257919	0.412254	-0.0682904	0.332922	0.08321	-0.0172593	0.402445	0.481234	0.316757	0.12428	0.0361962	0.365601
TCGA-EP-A2KB	Cluster_2	-0.294733	0.162123	0.207568	0.32343	-0.102049	0.0383818	0.0964065	0.0869923	-0.0668807	0.10992	0.223325	0.251095	0.290909	-0.145031	0.310385	0.00324526	-0.0728947	0.195534	0.507524	0.257155	0.0336961	-0.0797117	0.283137
TCGA-EP-A2KC	Cluster_2	-0.233047	0.0720335	0.205679	0.343327	-0.106139	0.0544956	0.112408	0.111968	-0.0516506	0.0895365	0.255215	0.274531	0.368216	-0.173932	0.321312	-0.0204093	-0.070298	0.192555	0.470207	0.249484	0.0606789	-0.223273	0.349875
TCGA-EP-A3JL	Cluster_2	-0.140642	0.197828	0.380655	0.353812	-0.0211741	0.197238	0.187901	0.164489	-0.0314451	0.0482126	0.304941	0.280019	0.433099	-0.199695	0.33365	0.104102	-0.025107	0.415538	0.500433	0.296107	0.131102	-0.0833046	0.368797
TCGA-EP-A3RK	Cluster_2	-0.0437248	0.261176	0.416779	0.431315	0.0378024	0.276241	0.23153	0.201403	-0.0487126	0.168742	0.258259	0.293327	0.393071	-0.126036	0.370752	0.105134	0.073771	0.466936	0.496795	0.266035	0.111854	-0.168241	0.366299
TCGA-ES-A2HS	Cluster_1	-0.26656	-0.0502428	0.214347	0.3003	-0.131	0.0558305	0.0855406	0.109356	-0.00867184	0.0150812	0.173498	0.265264	0.385786	-0.151277	0.294823	0.0403329	-0.0418362	0.18831	0.469117	0.252519	0.0450833	-0.121885	0.35189
TCGA-ES-A2HT	Cluster_1	-0.178168	0.0264329	0.283539	0.314664	-0.0728496	0.153234	0.119766	0.165204	0.00481193	0.0107104	0.284733	0.28849	0.444279	-0.11254	0.319525	0.0825892	-0.0351356	0.344888	0.516226	0.288557	0.0845347	-0.00888306	0.374939
TCGA-FV-A23B	Cluster_2	-0.198257	0.210894	0.247382	0.290783	-0.0328808	0.0949317	0.161308	0.107935	-0.0254144	0.0985421	0.247628	0.266975	0.315728	-0.136237	0.326338	0.0352622	-0.0601069	0.260117	0.51625	0.318311	0.0671002	-0.0582041	0.362434
TCGA-FV-A2QQ	Cluster_2	-0.181036	0.133123	0.330276	0.331894	-0.0628665	0.134163	0.137683	0.151116	-0.0399841	0.0126171	0.241302	0.287668	0.411557	-0.164554	0.349668	0.06984	-0.0417458	0.33165	0.505528	0.283903	0.0786026	-0.0516768	0.348499
TCGA-FV-A2QR	Cluster_2	-0.281334	0.068613	0.168345	0.288529	-0.117191	0.0740658	0.120433	0.135235	0.00465333	0.0487112	0.270475	0.265505	0.430279	-0.219967	0.337441	0.0364758	-0.106769	0.216048	0.523391	0.313492	0.0910488	-0.0489057	0.353538
TCGA-FV-A3I0	Cluster_3	-0.235353	0.0787659	0.164327	0.212844	-0.0995659	0.109208	0.116205	0.0961551	0.0880791	-0.0382877	0.265559	0.242823	0.395608	-0.112033	0.333976	0.0392149	-0.0321232	0.298388	0.430402	0.290907	0.0559829	-0.213845	0.364222
TCGA-FV-A3I1	Cluster_2	-0.150663	0.151723	0.244972	0.331526	-0.0157111	0.183864	0.154637	0.154602	0.0257399	0.0584794	0.294601	0.253826	0.417228	-0.140052	0.350793	0.071022	-0.0337671	0.351095	0.517237	0.299156	0.086318	-0.0766288	0.382784
TCGA-FV-A3R2	Cluster_2	-0.286488	0.0841534	0.202672	0.274183	-0.0952887	0.0474893	0.0972058	0.10102	-0.0175969	0.0677009	0.246903	0.289565	0.4233	-0.118973	0.338493	-0.0188238	-0.128149	0.184694	0.524627	0.330392	0.0121756	-0.0558928	0.309861
TCGA-FV-A3R3	Cluster_2	-0.177589	0.0169081	0.246484	0.298556	-0.0403854	0.176726	0.179711	0.171476	-0.0424755	0.033569	0.269409	0.282255	0.431533	-0.168	0.375965	0.111358	0.0135036	0.305459	0.519691	0.348752	0.116817	-0.0893321	0.318065
TCGA-FV-A495	Cluster_1	-0.0612549	0.158463	0.36573	0.339934	-0.0334738	0.215477	0.144201	0.179306	-0.0319855	0.0994434	0.239534	0.284045	0.414542	-0.161877	0.343873	0.109762	0.060124	0.40299	0.518488	0.289453	0.100628	-0.0983648	0.3582
TCGA-FV-A496	Cluster_1	-0.311414	-0.042873	0.122679	0.282072	-0.222265	-0.0373512	0.0368378	0.0628312	-0.0537624	0.000530923	0.20856	0.283183	0.407947	-0.171925	0.30991	-0.0668978	-0.155959	0.0816528	0.477004	0.244723	0.0168033	-0.0812955	0.33918
TCGA-FV-A4ZP	Cluster_3	-0.201715	0.128965	0.346573	0.305897	-0.0647202	0.173125	0.210032	0.111125	0.0146266	0.0116988	0.271721	0.244138	0.429357	-0.151002	0.298823	0.151972	-0.0277107	0.40388	0.53058	0.258251	0.0933145	0.0157856	0.371011
TCGA-FV-A4ZQ	Cluster_2	-0.053381	0.287207	0.436666	0.364845	0.064969	0.216274	0.22195	0.189181	-0.0031065	0.187835	0.290911	0.283924	0.283394	-0.126964	0.334515	0.0847235	0.0161918	0.388788	0.502132	0.251545	0.07372	-0.209103	0.309117
TCGA-G3-A25S	Cluster_2	-0.30652	0.153606	0.285756	0.351486	-0.0946079	0.106365	0.122644	0.0981393	0.0231555	0.0458536	0.256004	0.30737	0.402211	-0.11786	0.324573	0.0744571	-0.0366775	0.330977	0.461569	0.240831	0.105734	-0.0236635	0.346722
TCGA-G3-A25T	Cluster_2	-0.260971	0.0699584	0.239804	0.314956	-0.0910037	0.111258	0.122027	0.113699	0.0176942	-0.00206814	0.230846	0.243505	0.385303	-0.179332	0.293201	0.00678087	-0.0787017	0.306322	0.483226	0.259958	0.056937	-0.182555	0.345365
TCGA-G3-A25U	Cluster_2	-0.302118	0.0928195	0.174247	0.278125	-0.121428	0.0669682	0.0728105	0.0933465	0.0104232	0.064264	0.186716	0.271995	0.376274	-0.124956	0.308944	-0.00433139	-0.138722	0.164051	0.441154	0.304128	-0.0080115	-0.0473522	0.304807
TCGA-G3-A25V	Cluster_1	-0.156372	0.131183	0.317734	0.336027	-0.0262045	0.228046	0.173222	0.19435	-0.0118502	0.0864487	0.287135	0.270636	0.397341	-0.0657111	0.382101	0.106013	0.0405574	0.395501	0.510686	0.329916	0.0896882	-0.0317369	0.376367
TCGA-G3-A25X	Cluster_3	-0.180615	0.239922	0.39206	0.327977	-0.0514056	0.216754	0.219685	0.160642	0.0674844	0.155397	0.297504	0.263667	0.399357	-0.142782	0.356227	0.177038	0.0465953	0.437844	0.479487	0.337485	0.146555	-0.0613009	0.365251
TCGA-G3-A25Y	Cluster_3	-0.197664	0.213506	0.231894	0.283247	-0.0685015	0.103935	0.193389	0.136951	-0.0745754	0.100016	0.256108	0.240697	0.357139	-0.145881	0.328229	0.0318684	0.000876825	0.31887	0.501516	0.329001	0.0941534	-0.0932877	0.37744
TCGA-G3-A25Z	Cluster_1	-0.2582	0.0684447	0.208516	0.288779	-0.108661	0.139701	0.0994908	0.120395	-0.0145812	0.0640815	0.291461	0.297237	0.404564	-0.157145	0.352926	0.0170689	-0.0408393	0.285879	0.509249	0.284805	0.0811115	-0.06677	0.357665
TCGA-G3-A3CG	Cluster_2	-0.204481	0.0940673	0.235049	0.302659	-0.0965021	0.046755	0.0833476	0.11373	-0.0225489	0.0542832	0.244442	0.267668	0.410646	-0.140895	0.332255	-0.00426856	-0.0567408	0.268131	0.510114	0.303098	0.0660965	0.0210379	0.390887
TCGA-G3-A3CH	Cluster_2	-0.157259	0.113642	0.286898	0.301145	-0.049819	0.102942	0.174204	0.127719	0.0557286	0.0803237	0.267276	0.276152	0.416375	-0.160223	0.308724	0.0577809	-0.00643792	0.275742	0.47808	0.331181	0.0816418	-0.0766851	0.348616
TCGA-G3-A3CI	Cluster_1	-0.138022	0.0260111	0.299564	0.299695	-0.0165041	0.153003	0.160482	0.143707	0.00686225	0.0913976	0.285049	0.265877	0.380772	-0.062348	0.390932	0.067199	0.0834617	0.360179	0.531711	0.297681	0.0649394	0.0767427	0.364977
TCGA-G3-A3CJ	Cluster_1	-0.19577	-0.00562152	0.262122	0.36339	-0.100479	0.0493486	0.14212	0.119356	-0.02659	0.0630568	0.237134	0.254157	0.381718	-0.0948751	0.352495	-0.0161495	-0.0782722	0.214211	0.485506	0.240448	0.0386015	-0.198144	0.304106
TCGA-G3-A3CK	Cluster_2	-0.137673	0.109282	0.324386	0.308025	-0.0293861	0.135834	0.152464	0.165939	-0.0351757	0.101195	0.28061	0.293473	0.360927	-0.111239	0.351285	0.00896254	-0.0863127	0.262955	0.478912	0.258331	0.0606514	-0.154184	0.32404
TCGA-G3-A5SI	Cluster_2	-0.365409	0.11586	0.114398	0.268137	-0.181502	0.00646923	0.0513341	0.0642466	0.0380577	0.0765015	0.206516	0.259645	0.422766	-0.156118	0.322286	-0.0115628	-0.138538	0.118713	0.510754	0.244548	0.0622309	-0.119648	0.279677
TCGA-G3-A5SJ	Cluster_2	-0.140647	0.240048	0.360392	0.331474	-0.00113388	0.197461	0.173241	0.166575	0.0399741	0.116978	0.294202	0.287767	0.42732	-0.127423	0.36769	0.057258	0.020974	0.402151	0.491005	0.33208	0.110461	-0.0553805	0.365961
TCGA-G3-A5SK	Cluster_1	-0.166659	0.100219	0.337227	0.316396	-0.0236498	0.255893	0.129204	0.209098	0.0187719	0.0832181	0.263523	0.264178	0.370044	-0.0785437	0.348456	0.0933015	-0.0327031	0.334081	0.526953	0.323456	0.0637059	-0.0170684	0.333422
TCGA-G3-A5SL	Cluster_1	-0.275777	0.0432619	0.207056	0.290618	-0.122921	0.0603462	0.122091	0.120376	-0.0517538	0.0605425	0.194908	0.274249	0.383804	-0.0872284	0.330218	-0.0312774	-0.0356286	0.163286	0.464671	0.246568	0.0218894	-0.178646	0.302478
TCGA-G3-A5SM	Cluster_1	-0.102974	0.138545	0.261267	0.319135	-0.0159103	0.190801	0.143867	0.160494	0.00444182	0.100119	0.300132	0.269879	0.414201	-0.202863	0.34792	0.0768775	-0.00219519	0.362615	0.557546	0.312267	0.122375	-0.0452371	0.362912
TCGA-G3-A6UC	Cluster_2	-0.329063	-0.0804772	0.1854	0.297508	-0.12124	0.0335549	0.103147	0.0925322	-0.0458651	0.0400126	0.186451	0.254025	0.356507	-0.112901	0.337174	-0.0906864	-0.142758	0.119567	0.42415	0.258241	0.0243024	-0.226271	0.281503
TCGA-G3-A7M5	Cluster_1	-0.300478	-0.00156706	0.29711	0.273793	-0.140689	0.0370415	0.098159	0.113295	0.00630902	-0.0158542	0.210409	0.237482	0.388319	-0.108637	0.306072	0.0568288	-0.0921892	0.294927	0.475319	0.286115	0.0362606	-0.0550423	0.287017
TCGA-G3-A7M6	Cluster_3	-0.193804	0.116563	0.204293	0.283438	-0.0949721	0.0389593	0.132171	0.115797	-0.0255606	0.0493746	0.218151	0.274619	0.361596	-0.228788	0.362045	-0.0149217	-0.083606	0.288602	0.47297	0.295697	0.0758563	-0.149256	0.384544
TCGA-G3-A7M7	Cluster_1	-0.261615	-0.0207436	0.219839	0.280463	-0.16009	0.0609918	0.0734296	0.109426	0.00511433	-0.0124884	0.242613	0.273124	0.407	-0.176142	0.328164	-0.0303275	-0.0895486	0.193354	0.477297	0.272032	0.0596558	-0.00998251	0.347893
TCGA-G3-A7M8	Cluster_1	-0.247671	-0.0120682	0.127723	0.355977	-0.100194	0.145941	0.14936	0.119573	0.0202981	0.0572074	0.273121	0.276219	0.406398	-0.0744018	0.391884	0.0719938	-0.00896594	0.22634	0.504763	0.309097	0.0600294	-0.125137	0.365234
TCGA-G3-A7M9	Cluster_3	-0.274351	0.157116	0.174542	0.284943	-0.180555	0.0330743	0.106038	0.0631322	-0.0971804	0.0610307	0.219569	0.266657	0.355542	-0.214241	0.371417	0.00839949	-0.0642788	0.22212	0.442333	0.230077	0.055642	-0.132836	0.321305
TCGA-G3-AAUZ	Cluster_1	-0.115458	0.132845	0.344475	0.335542	-0.0428869	0.181849	0.140315	0.149631	0.0111221	0.0829117	0.251182	0.293195	0.416018	-0.0777903	0.324979	0.105774	0.0333815	0.354255	0.504385	0.298317	0.0899739	-0.0894496	0.329495
TCGA-G3-AAV0	Cluster_1	-0.162548	0.0299626	0.27494	0.281234	-0.107283	0.0798295	0.0796436	0.138471	-0.0205873	0.0239773	0.216128	0.272057	0.381715	-0.145798	0.296423	0.0280307	-0.0470916	0.206938	0.515824	0.251863	0.0227877	-0.121046	0.319344
TCGA-G3-AAV1	Cluster_2	-0.317265	0.0954337	0.190756	0.325941	-0.101668	0.099033	0.128327	0.0823109	0.00186063	0.0754809	0.258507	0.281998	0.402292	-0.111454	0.363559	-0.0271914	-0.101197	0.202667	0.48987	0.26623	0.0419058	-0.19659	0.323803
TCGA-G3-AAV2	Cluster_1	-0.294869	-0.0864117	0.188987	0.315509	-0.130749	0.0457376	0.126788	0.106486	-0.0501568	0.0118214	0.197259	0.30495	0.369386	-0.126001	0.321489	-0.0377115	0.00738698	0.180568	0.470034	0.22527	0.0357885	-0.240455	0.339592
TCGA-G3-AAV3	Cluster_2	-0.0399164	0.180704	0.418012	0.384616	0.0320108	0.203388	0.196692	0.176429	-0.0238858	0.135389	0.263904	0.283514	0.372731	-0.164672	0.344471	0.0226376	-0.0531591	0.386171	0.48999	0.286741	0.0786251	-0.216057	0.338847
TCGA-G3-AAV4	Cluster_2	-0.294628	0.0361533	0.236051	0.271996	-0.108462	0.0595322	0.146872	0.0738923	-0.00646508	0.090535	0.181156	0.281917	0.377553	-0.117699	0.358674	-0.0567013	-0.103067	0.146383	0.456958	0.281006	0.0320386	-0.19952	0.336057
TCGA-G3-AAV5	Cluster_2	-0.190362	0.100386	0.268142	0.295063	-0.0305754	0.0666786	0.0936946	0.0818576	-0.0437605	0.0625395	0.228212	0.289642	0.387398	-0.103322	0.335873	-0.0164634	-0.0475162	0.204113	0.469634	0.187633	0.046297	-0.184033	0.261549
TCGA-G3-AAV6	Cluster_3	-0.318283	0.142011	0.207478	0.29572	-0.193316	0.00955424	0.0869091	0.0866323	-0.0552304	0.0921395	0.19381	0.264224	0.325089	-0.218722	0.272502	-0.0324286	-0.0404933	0.199644	0.489603	0.187505	0.0238531	-0.179251	0.301505
TCGA-G3-AAV7	Cluster_3	-0.224237	0.265027	0.147545	0.31853	-0.100325	0.184671	0.176717	0.116787	-0.0301161	0.184123	0.289391	0.268338	0.410872	-0.17141	0.38619	0.0673092	-0.046009	0.32139	0.503495	0.281344	0.0926878	-0.0890138	0.366088
TCGA-GJ-A3OU	Cluster_2	-0.055456	0.282242	0.39981	0.414813	0.109079	0.413609	0.284833	0.258409	0.0314956	0.10431	0.363745	0.312814	0.427177	-0.127853	0.403516	0.231159	0.139369	0.569555	0.56241	0.361184	0.181385	-0.0219161	0.411929
TCGA-GJ-A6C0	Cluster_2	-0.248923	0.159886	0.227081	0.36181	-0.0396876	0.227833	0.156773	0.168845	0.00740534	0.120041	0.316954	0.314789	0.425248	-0.109919	0.341751	0.103242	-0.0258414	0.454322	0.545697	0.319207	0.107158	-0.0495464	0.356336
TCGA-GJ-A9DB	Cluster_2	-0.27672	0.0926726	0.159965	0.293305	-0.0899093	0.172366	0.10294	0.126876	0.0252808	0.0257504	0.264807	0.284521	0.431175	-0.109023	0.364652	0.0400702	-0.0468219	0.288554	0.497488	0.318769	0.0824082	-0.144911	0.354089
TCGA-HP-A5MZ	Cluster_1	-0.117372	0.172213	0.350981	0.350021	-0.0143045	0.237666	0.200868	0.214256	-0.0054471	0.0611096	0.326028	0.281447	0.423423	-0.102498	0.35861	0.133787	0.0535119	0.446673	0.501006	0.350236	0.143702	-0.0182925	0.378761
TCGA-HP-A5N0	Cluster_2	-0.169253	-0.0388484	0.241075	0.321282	-0.0701867	0.175199	0.157765	0.154957	0.0356716	0.0632455	0.254307	0.266134	0.424263	-0.165385	0.326184	0.0836187	-0.0183243	0.238044	0.518441	0.344506	0.0791273	-0.054436	0.353523
TCGA-K7-A5RF	Cluster_1	-0.0585407	0.128872	0.325659	0.32248	0.0497255	0.294991	0.181775	0.201516	0.0210765	0.105364	0.233731	0.27145	0.378452	-0.000230226	0.406193	0.139708	0.0768823	0.408937	0.534304	0.357654	0.117747	0.0213905	0.361948
TCGA-K7-A5RG	Cluster_2	0.137359	0.33902	0.511216	0.346396	0.189488	0.255941	0.239058	0.248512	-0.0172827	0.119781	0.333076	0.279362	0.405375	-0.0782072	0.353461	0.152586	0.010164	0.501043	0.566914	0.369963	0.158295	-0.0436843	0.365608
TCGA-K7-A6G5	Cluster_1	-0.149655	0.112868	0.316512	0.316859	-0.0395999	0.162012	0.138028	0.142848	-0.0165058	0.0643312	0.264173	0.297013	0.403475	-0.129099	0.354417	0.0787153	-0.0433466	0.337333	0.497709	0.304638	0.0916239	-0.00401828	0.356923
TCGA-K7-AAU7	Cluster_2	-0.239761	0.177207	0.185811	0.270633	-0.0583539	0.148343	0.129501	0.156495	0.0588493	0.0790617	0.269329	0.311324	0.417118	-0.0752119	0.383395	0.0428977	-0.00677804	0.313924	0.497603	0.334806	0.0985859	-0.00726249	0.397839
TCGA-KR-A7K0	Cluster_2	-0.25077	0.101245	0.226501	0.333607	-0.108783	0.128878	0.159032	0.14006	-0.050395	0.0506197	0.285384	0.286421	0.386027	-0.0966983	0.338646	0.024578	-0.0710554	0.218435	0.481216	0.291419	0.0639088	-0.145673	0.343168
TCGA-KR-A7K2	Cluster_1	-0.209614	0.131795	0.299447	0.280168	-0.120771	0.0831195	0.100833	0.127735	-0.0286496	0.0599274	0.271749	0.296111	0.434023	-0.125244	0.293206	0.0345019	-0.0628407	0.282214	0.503405	0.279184	0.0586706	-0.0430565	0.336908
TCGA-KR-A7K7	Cluster_1	-0.129085	0.277051	0.399786	0.352812	-0.0599057	0.101914	0.156271	0.128342	-0.0700834	0.10396	0.325646	0.271844	0.315762	-0.19796	0.307517	0.0284295	-0.0832077	0.377767	0.515602	0.222005	0.0649956	-0.123872	0.355188
TCGA-KR-A7K8	Cluster_2	-0.0960635	0.172081	0.417639	0.358287	0.0107947	0.204509	0.199123	0.184532	0.0198722	0.0507863	0.277614	0.261971	0.432514	-0.0857606	0.344047	0.117498	0.0407152	0.41466	0.481062	0.31582	0.120568	-0.0695615	0.346353
TCGA-LG-A6GG	Cluster_1	-0.286539	0.0609411	0.162923	0.297055	-0.138264	0.0374392	0.0652144	0.0796648	0.0547942	0.0865199	0.261183	0.269562	0.379281	-0.135764	0.332585	-0.0417548	-0.13696	0.191263	0.489762	0.291483	0.0701565	-0.0257013	0.378158
TCGA-LG-A9QC	Cluster_2	-0.333665	0.0241459	0.17798	0.335921	-0.149336	0.0136297	0.132342	0.110515	-0.0516847	0.0441339	0.201082	0.265012	0.423678	-0.12468	0.296489	-0.0389455	-0.123414	0.104748	0.463643	0.220847	0.0182803	-0.234035	0.33566
TCGA-LG-A9QD	Cluster_1	-0.105704	0.0471058	0.280161	0.289921	-0.0482882	0.0952122	0.0869204	0.122474	0.036353	0.0123576	0.261005	0.268046	0.352558	-0.103635	0.313033	0.0265076	-0.0545003	0.24518	0.458838	0.290664	0.0465724	-0.0555245	0.348307
TCGA-MI-A75C	Cluster_1	-0.247884	0.112184	0.337196	0.292386	-0.0871215	0.0538499	0.0981453	0.128058	0.00874765	0.0358542	0.278221	0.280554	0.395455	-0.141352	0.335942	0.00260576	-0.108639	0.300161	0.474108	0.199141	0.0267608	-0.0234218	0.359362
TCGA-MI-A75E	Cluster_1	-0.121276	0.10585	0.337636	0.316881	-0.0494271	0.16463	0.145333	0.17265	0.0018152	0.0379595	0.27206	0.279048	0.400176	-0.12378	0.374779	0.0607489	-0.0191111	0.358232	0.498813	0.333285	0.0761753	-0.0131604	0.374555
TCGA-MI-A75G	Cluster_1	-0.278497	-0.0209882	0.183466	0.307426	-0.158469	-0.00343814	0.0359032	0.0843245	0.00601522	0.0140203	0.167768	0.257342	0.402427	-0.150061	0.313264	-0.0288855	-0.115333	0.169925	0.505587	0.23907	0.0214248	-0.0417395	0.316363
TCGA-MI-A75H	Cluster_1	-0.175089	0.0926002	0.360971	0.326931	-0.0368286	0.108032	0.175918	0.158811	-0.0315096	0.0656254	0.215783	0.294075	0.378098	-0.0808267	0.343231	0.0156261	-0.0402368	0.286149	0.486972	0.271266	0.0849336	-0.220154	0.295797
TCGA-MI-A75I	Cluster_2	-0.310443	0.095582	0.213992	0.32921	-0.134865	0.0780251	0.0771428	0.0903265	-0.0181028	0.0618404	0.22418	0.282442	0.412811	-0.201245	0.32638	-0.0442042	-0.0859917	0.228797	0.462235	0.274735	0.0521802	-0.0781322	0.311936
TCGA-MR-A520	Cluster_1	-0.242701	-0.0283793	0.24517	0.285669	-0.0804189	0.0984804	0.106644	0.115997	-0.0164256	0.0621069	0.221713	0.263408	0.379695	-0.184462	0.364021	0.00450619	-0.0216921	0.227675	0.519041	0.277355	0.0199255	-0.065966	0.32981
TCGA-MR-A8JO	Cluster_2	-0.125336	0.108789	0.406706	0.342088	-0.0459661	0.266215	0.164028	0.191904	-0.0466752	0.0815313	0.265033	0.296805	0.42771	-0.145379	0.361791	0.110067	0.0138355	0.393083	0.495139	0.309842	0.126931	-0.0965793	0.402282
TCGA-NI-A4U2	Cluster_1	-0.307319	-0.00223883	0.180867	0.279391	-0.124717	0.151557	0.123413	0.133502	-0.0623467	0.057451	0.202627	0.246472	0.399774	-0.100336	0.366194	-0.0238546	-0.0839494	0.214905	0.483339	0.303017	0.0472562	-0.130821	0.34469
TCGA-NI-A8LF	Cluster_2	-0.283012	0.0069087	0.216926	0.336371	-0.159668	0.0310623	0.121669	0.129402	-0.00553831	0.0781275	0.222	0.270705	0.386679	-0.0338883	0.3423	0.038042	-0.0620615	0.199712	0.511366	0.277422	0.07641	-0.187846	0.32843
TCGA-O8-A75V	Cluster_1	-0.105343	0.135709	0.334611	0.35024	-0.0223001	0.203691	0.162991	0.146174	-0.0159478	0.0368926	0.286681	0.291396	0.414635	-0.175644	0.339291	0.0869338	0.0286054	0.390834	0.504306	0.29663	0.120526	-0.0844142	0.351123
TCGA-PD-A5DF	Cluster_2	-0.239684	0.163962	0.188093	0.326669	-0.0837194	0.227237	0.14839	0.150917	-0.00215568	0.119472	0.283421	0.257029	0.410633	-0.137499	0.363986	0.0815287	-0.0263073	0.370973	0.494342	0.322921	0.110681	-0.182618	0.35193
TCGA-QA-A7B7	Cluster_3	-0.226838	0.18651	0.202771	0.292206	-0.0724555	-0.0173896	0.0150093	0.103081	-0.0560712	0.123351	0.215341	0.244938	0.359464	-0.27978	0.286943	-0.0271149	-0.148592	0.195851	0.491086	0.239127	0.0177727	-0.1658	0.290819
TCGA-RC-A6M3	Cluster_3	-0.299356	0.210976	0.259561	0.270649	-0.15473	0.0915841	0.111455	0.0787635	0.0158925	0.173259	0.258166	0.298287	0.36296	-0.156806	0.34196	0.0429641	-0.0292146	0.21747	0.473454	0.251597	0.0859988	-0.14717	0.319777
TCGA-RC-A6M4	Cluster_1	-0.364823	0.00182055	0.163412	0.318877	-0.18719	-0.0012238	0.0975268	0.0636331	-0.0731457	0.0143779	0.201324	0.227522	0.37723	-0.190942	0.327225	-0.0996391	-0.222379	0.0627757	0.466578	0.215177	-0.0142068	-0.291731	0.301637
TCGA-RC-A6M5	Cluster_1	-0.190687	-0.0740911	0.20028	0.287097	-0.14679	0.129251	0.101766	0.138682	-0.0470011	0.0109297	0.246574	0.29323	0.393792	-0.15104	0.310133	0.0679839	-0.0486874	0.22169	0.49754	0.285858	0.0925754	-0.0559547	0.38027
TCGA-RC-A6M6	Cluster_3	-0.287668	0.121149	0.209529	0.286396	-0.127085	0.118821	0.118134	0.0930623	-0.0288065	0.0438389	0.243276	0.252328	0.386358	-0.207777	0.311881	-0.0166585	-0.102352	0.267238	0.462732	0.215563	0.0464856	-0.151703	0.369657
TCGA-RC-A7S9	Cluster_1	-0.171778	0.133074	0.25278	0.270793	-0.0907136	0.0196652	0.114755	0.101778	0.0217653	0.146072	0.288046	0.2673	0.403238	-0.175597	0.332741	0.0695635	-0.078651	0.238232	0.522423	0.238842	0.0618681	-0.110458	0.329444
TCGA-RC-A7SB	Cluster_1	-0.307818	0.0279787	0.200516	0.318512	-0.131296	0.0943531	0.0585759	0.0928788	0.0255206	0.0566469	0.231572	0.296969	0.402145	-0.189443	0.33914	-0.00609787	-0.0954236	0.297279	0.517182	0.295659	0.0477268	-0.141287	0.295258
TCGA-RC-A7SF	Cluster_1	-0.242411	0.121277	0.284375	0.303894	-0.0977701	0.0657691	0.0856445	0.127342	0.0212228	0.0291875	0.242877	0.255398	0.371363	-0.141408	0.295797	-0.0288577	-0.080769	0.238127	0.480083	0.271359	0.071049	-0.0690673	0.348792
TCGA-RC-A7SH	Cluster_2	-0.293543	0.10299	0.179847	0.256842	-0.17759	-0.0926941	0.0593192	0.061305	-0.0401943	0.0322439	0.193373	0.247114	0.396605	-0.2158	0.28839	-0.0604074	-0.145461	0.154301	0.486665	0.219769	0.0171734	-0.122436	0.318899
TCGA-RC-A7SK	Cluster_1	-0.284227	-0.0319984	0.187862	0.253313	-0.177461	-0.0183776	0.0376448	0.075178	0.0200203	-0.0139684	0.249103	0.246956	0.38511	-0.206821	0.3267	-0.0149185	-0.174307	0.113779	0.510758	0.265378	0.0483266	-0.142538	0.292702
TCGA-RG-A7D4	Cluster_3	0.0502834	0.299734	0.440735	0.350684	0.0644897	0.116085	0.184198	0.138181	-0.0525912	0.128417	0.282443	0.267071	0.294631	-0.13047	0.33156	0.0431221	-0.0341468	0.395716	0.481475	0.249518	0.101305	-0.246651	0.310428
TCGA-T1-A6J8	Cluster_1	-0.263848	-0.0420247	0.186927	0.282333	-0.120214	0.110309	0.0833427	0.110125	-0.000353919	-0.0534687	0.242562	0.265421	0.427628	-0.193117	0.38779	0.0145915	-0.0782899	0.228528	0.539096	0.284707	0.0530264	-0.0517584	0.365968
TCGA-UB-A7MA	Cluster_3	-0.300215	0.149492	0.195734	0.23192	-0.123359	-0.00138748	0.102891	0.0861401	0.0316545	0.0972357	0.240946	0.285427	0.387583	-0.127541	0.305325	-0.0109639	-0.12228	0.209849	0.451526	0.299489	0.0910532	-0.0743018	0.373841
TCGA-UB-A7MB	Cluster_3	-0.345021	0.106048	0.155479	0.30234	-0.166408	0.0426139	0.0734211	0.0769289	0.0109476	0.117134	0.15547	0.264356	0.391748	-0.211173	0.31212	-0.0476527	-0.168185	0.142109	0.443113	0.266731	0.0412345	-0.065627	0.303575
TCGA-UB-A7MC	Cluster_2	-0.305522	0.121079	0.125443	0.27718	-0.171626	-0.0161812	0.103291	0.077234	-0.0308682	0.109337	0.189307	0.251131	0.371994	-0.11967	0.317754	-0.076584	-0.113277	0.106963	0.457251	0.230272	0.035584	-0.219198	0.289559
TCGA-UB-A7MD	Cluster_2	-0.182604	0.160927	0.241384	0.362949	-0.0606105	0.192191	0.187196	0.161117	-0.0296199	0.043965	0.296051	0.281384	0.413849	-0.0583262	0.369321	0.0717	-0.0325363	0.35566	0.505267	0.307039	0.095885	-0.124455	0.348285
TCGA-UB-A7ME	Cluster_2	-0.0283302	0.184114	0.376988	0.309597	0.0101736	0.129144	0.183742	0.151261	-0.0537643	0.0140704	0.251478	0.272	0.421275	-0.125522	0.298307	0.0519958	-0.0563618	0.361795	0.491218	0.297426	0.098489	-0.151124	0.325399
TCGA-UB-A7MF	Cluster_2	-0.0717347	0.255247	0.44344	0.312954	0.0136727	0.230643	0.199679	0.167501	0.0299171	0.0912394	0.299587	0.292328	0.336068	-0.169171	0.352745	0.142085	0.138897	0.393137	0.498553	0.300431	0.126351	-0.110104	0.336381
TCGA-UB-AA0U	Cluster_2	-0.195329	0.185633	0.220893	0.305117	-0.0562049	0.201372	0.160991	0.143554	-0.00663081	0.125116	0.272316	0.279586	0.386512	-0.164508	0.354627	0.0640049	0.00859008	0.338735	0.526417	0.320266	0.117187	-0.0919444	0.346501
TCGA-UB-AA0V	Cluster_2	-0.198382	0.0197549	0.242017	0.306119	-0.0647649	0.219223	0.144392	0.176672	0.00370547	0.124028	0.242754	0.260026	0.370779	-0.0751055	0.391152	0.0560984	0.0140794	0.296059	0.521528	0.315361	0.0913149	-0.101132	0.333687
TCGA-WJ-A86L	Cluster_2	-0.249461	0.0673082	0.162412	0.29096	-0.0671967	-0.00556628	0.0592907	0.101515	-0.0329704	0.00843768	0.232313	0.24751	0.326225	-0.262738	0.282356	-0.0309118	-0.167988	0.268734	0.50338	0.221303	0.0445122	-0.12686	0.296786
TCGA-WQ-A9G7	Cluster_3	-0.273893	0.1181	0.16624	0.310657	-0.177507	-0.0385465	0.133568	0.0893501	-0.0462887	0.00510446	0.230826	0.2826	0.483189	-0.119158	0.27455	-0.0551081	-0.107539	0.184171	0.521665	0.218036	0.0224396	-0.141409	0.371688
TCGA-WQ-AB4B	Cluster_1	-0.234692	0.0983333	0.246743	0.33091	-0.0979807	0.0861745	0.116774	0.134048	-0.01745	0.0525289	0.273267	0.293729	0.39455	-0.11302	0.327117	0.0620157	-0.0243044	0.299599	0.493228	0.285838	0.096601	-0.0680469	0.379207
TCGA-WX-AA44	Cluster_2	-0.218007	0.158649	0.234412	0.286051	-0.142855	0.00184842	0.158145	0.120849	-0.0403095	0.0859922	0.291097	0.286732	0.374206	-0.190415	0.328348	0.0317854	-0.0635638	0.260384	0.53202	0.293844	0.0917483	-0.154256	0.359703
TCGA-WX-AA46	Cluster_2	-0.219161	-0.00692234	0.203121	0.304244	-0.0794879	0.210081	0.129669	0.167583	0.00297033	0.0874014	0.222536	0.268886	0.343192	-0.0434219	0.357185	0.0827055	-0.0113908	0.280531	0.509683	0.260059	0.0576971	-0.00688337	0.326101
TCGA-WX-AA47	Cluster_1	-0.226462	0.0215207	0.146203	0.249259	-0.166293	-0.0472256	0.00167485	0.0961304	0.01117	0.071394	0.187412	0.29347	0.398187	-0.150787	0.298412	-0.0243509	-0.163264	0.136671	0.477464	0.145831	0.00222307	-0.0880025	0.354532
TCGA-XR-A8TC	Cluster_2	-0.294497	0.133476	0.139739	0.275631	-0.145471	0.00856796	0.0611732	0.0877816	-0.0728236	0.0590406	0.224742	0.243706	0.378381	-0.117584	0.288872	-0.0128238	-0.140592	0.144651	0.495467	0.265126	0.0260533	-0.108237	0.301775
TCGA-XR-A8TD	Cluster_2	-0.0970415	0.265129	0.431577	0.379822	0.0976425	0.324259	0.220758	0.201183	-0.0261788	0.0584315	0.29602	0.282721	0.442124	-0.136331	0.392614	0.139019	0.0348439	0.505424	0.509335	0.341162	0.154074	-0.0683161	0.365627
TCGA-XR-A8TE	Cluster_2	-0.25845	0.0883106	0.168473	0.302963	-0.116334	0.0793588	0.139226	0.105397	-0.0781575	0.0888182	0.231265	0.270468	0.331033	-0.0974393	0.319666	-0.0440774	0.00334491	0.172953	0.479721	0.277229	0.0391306	-0.224792	0.345032
TCGA-XR-A8TF	Cluster_2	-0.277667	0.0903959	0.215795	0.279271	-0.11365	0.0096863	0.113245	0.0810596	-0.0163668	0.0704106	0.1684	0.248469	0.37488	-0.0922696	0.323401	0.0226324	-0.101457	0.159284	0.446396	0.226005	0.025302	-0.117957	0.297699
TCGA-XR-A8TG	Cluster_2	-0.220003	0.235894	0.182152	0.282163	-0.128556	0.0864587	0.105703	0.126786	0.0255497	0.130448	0.278895	0.286364	0.362912	-0.0321373	0.359424	-0.00380962	0.0592178	0.253676	0.487928	0.328785	0.0947418	-0.045118	0.364312
TCGA-YA-A8S7	Cluster_3	-0.176296	0.242309	0.256041	0.335754	-0.00253261	0.365257	0.230052	0.171393	-0.0612962	0.0871633	0.334936	0.25452	0.408287	-0.117045	0.377453	0.207173	0.05511	0.494666	0.475348	0.314048	0.159565	-0.112227	0.428645
TCGA-ZP-A9CV	Cluster_2	-0.15021	0.165857	0.298201	0.31152	-0.02331	0.185848	0.150898	0.142679	-0.00145544	0.0365061	0.265055	0.252075	0.391828	-0.0842005	0.332771	0.051469	-0.0497511	0.356458	0.48658	0.331422	0.0883482	0.0226855	0.375881
TCGA-ZP-A9CY	Cluster_1	-0.17277	0.0495894	0.219622	0.324457	-0.0355312	0.207747	0.116256	0.164466	-0.0262174	0.060927	0.295791	0.266486	0.36332	-0.191014	0.361633	0.0689289	-0.0249799	0.289992	0.514907	0.319715	0.0826201	-0.04835	0.350663
TCGA-ZP-A9CZ	Cluster_3	-0.0870573	0.238239	0.313969	0.335807	-0.0091177	0.158126	0.186441	0.151058	-0.0077836	0.124841	0.238724	0.295423	0.390542	-0.14205	0.372131	0.13687	0.00179115	0.377446	0.470801	0.320218	0.106729	-0.0489282	0.347285
TCGA-ZP-A9D0	Cluster_2	-0.247623	-0.0171943	0.165704	0.280716	-0.157249	0.0631507	0.084506	0.108862	-0.0589281	0.0308542	0.201035	0.247663	0.441925	-0.0994915	0.325616	0.0678735	-0.112235	0.165433	0.467601	0.261013	-0.00261641	-0.138908	0.304527
TCGA-ZP-A9D1	Cluster_2	-0.174265	0.0985429	0.27261	0.333908	-0.0892751	0.124536	0.122556	0.14657	-0.0192808	0.0231656	0.288855	0.266973	0.39696	-0.130883	0.326326	0.0451618	-0.0666591	0.299535	0.497094	0.315224	0.0901426	0.0914966	0.362278
TCGA-ZP-A9D2	Cluster_3	-0.156966	0.130161	0.135899	0.260757	-0.0813969	0.0834426	0.126099	0.125743	-0.0176302	0.121678	0.254462	0.298662	0.353586	-0.210856	0.337287	-0.0278369	-0.0346173	0.221595	0.517842	0.322995	0.0926589	-0.179546	0.396715
TCGA-ZP-A9D4	Cluster_2	-0.29335	0.0138237	0.157848	0.298425	-0.153526	0.0562769	0.131679	0.0969912	-0.0660396	0.0290567	0.222099	0.283455	0.355078	-0.175429	0.331522	-0.00580435	-0.157614	0.161416	0.492086	0.243198	0.0393909	-0.145429	0.305031
TCGA-ZS-A9CD	Cluster_1	-0.213171	0.0976323	0.237046	0.310902	-0.103306	0.104519	0.131089	0.136745	-0.00752415	0.0173044	0.304246	0.259523	0.413649	-0.125612	0.340226	0.0733575	0.0130413	0.329799	0.472331	0.315061	0.0821006	0.0384981	0.368046
TCGA-ZS-A9CE	Cluster_1	-0.276426	-0.0399911	0.102061	0.249905	-0.19107	0.0253445	0.0223531	0.0955874	-0.0154538	0.0441469	0.150368	0.242413	0.394101	-0.231688	0.32638	-0.00542734	-0.171283	0.216675	0.496909	0.236719	-0.0149714	-0.18303	0.312266
TCGA-ZS-A9CF	Cluster_2	-0.301806	0.179161	0.220351	0.303475	-0.106291	0.0813579	0.115947	0.114418	0.00637938	0.0789213	0.235926	0.298295	0.376801	-0.0854011	0.29757	0.0365853	-0.0931257	0.243845	0.47294	0.337037	0.0488424	-0.102032	0.315893
TCGA-ZS-A9CG	Cluster_1	-0.260276	-0.0539358	0.212127	0.323714	-0.132678	0.07021	0.134178	0.137407	-0.0332714	0.0453728	0.205564	0.287699	0.37217	-0.0615258	0.347296	-0.0270714	0.0789287	0.213904	0.466112	0.238403	0.0447458	-0.160978	0.342152
