# Supplementary material for: Uncovering the Association Between m5C Regulator-Mediated Methylation Modification Patterns and Tumour Microenvironment Infiltration Characteristics in Hepatocellular Carcinoma
Source: Front Cell Dev Biol. 2021 Sep 13;9:727935. doi: 10.3389/fcell.2021.727935 (PMC8475949; doi:10.3389/fcell.2021.727935)
Supplement: Supplementary Table 6 — Functional annotation of m5C phenotype-related genes. [file Table_6.xlsx]

## Sheet: Sheet1
Supplementary Table 6: Functional annotation for m5C phenotype -related genes (Gene Ontology-Biological process)
ID	Description	GeneRatio	BgRatio	pvalue	p.adjust	qvalue	geneID	Count
GO:0045165	cell fate commitment	20/263	271/18670	1.80116e-09	4.93518e-06	4.47257e-06	6656/3670/7080/26011/4909/7476/58524/3207/2253/84504/1745/148979/7475/7471/2128/8456/2596/4654/2066/2138	20
GO:0007389	pattern specification process	25/263	446/18670	4.87818e-09	6.68311e-06	6.05665e-06	6656/3670/3218/3222/257/7080/3229/3227/3237/4909/7476/58524/3207/2253/5308/84504/1745/7475/7471/2128/3975/2066/344022/2138/5100	25
GO:0003002	regionalization	21/263	351/18670	2.87809e-08	2.62866e-05	2.38225e-05	6656/3670/3218/3222/7080/3229/3227/3237/4909/7476/58524/3207/2253/5308/84504/1745/7471/2128/3975/344022/5100	21
GO:0021953	central nervous system neuron differentiation	15/263	183/18670	5.09805e-08	3.00182e-05	2.72043e-05	6656/3670/7080/7476/58524/2253/27164/84504/1745/7471/2128/401/3975/431707/2066	15
GO:0009953	dorsal/ventral pattern formation	11/263	90/18670	5.47777e-08	3.00182e-05	2.72043e-05	6656/7080/3237/7476/58524/3207/2253/84504/2128/3975/344022	11
GO:0048663	neuron fate commitment	9/263	65/18670	3.05947e-07	0.000139716	0.000126619	6656/3670/7080/58524/84504/1745/7471/2128/2138	9
GO:0021515	cell differentiation in spinal cord	8/263	54/18670	8.28264e-07	0.000324206	0.000293816	6656/3670/58524/84504/7471/2128/401/3975	8
GO:0021510	spinal cord development	10/263	106/18670	2.52079e-06	0.000813146	0.000736923	6656/3670/3218/4747/58524/84504/7471/2128/401/3975	10
GO:0007271	synaptic transmission, cholinergic	6/263	29/18670	2.67092e-06	0.000813146	0.000736923	60482/89832/1144/1142/1136/1139	6
GO:0072009	nephron epithelium development	10/263	109/18670	3.25149e-06	0.000890908	0.000807396	3237/3207/2253/9370/7475/7471/3975/2138/4868/7827	10
GO:0021517	ventral spinal cord development	7/263	48/18670	4.5698e-06	0.00100623	0.000911905	6656/3670/58524/84504/2128/401/3975	7
GO:0060078	regulation of postsynaptic membrane potential	11/263	140/18670	4.80279e-06	0.00100623	0.000911905	2565/2898/1144/7476/4887/1142/1136/1139/55584/2915/50944	11
GO:0072073	kidney epithelium development	11/263	140/18670	4.80279e-06	0.00100623	0.000911905	2045/3237/3207/2253/9370/7475/7471/3975/2138/4868/7827	11
GO:0021879	forebrain neuron differentiation	7/263	49/18670	5.26785e-06	0.00100623	0.000911905	6656/7080/2253/27164/1745/431707/2066	7
GO:0072006	nephron development	11/263	142/18670	5.50854e-06	0.00100623	0.000911905	8710/3237/3207/2253/9370/7475/7471/3975/2138/4868/7827	11
GO:0048665	neuron fate specification	6/263	34/18670	7.12843e-06	0.00122074	0.00110631	6656/3670/58524/84504/2128/2138	6
GO:0048736	appendage development	12/263	179/18670	9.18578e-06	0.00139828	0.00126721	257/3229/3227/343637/7476/3207/2253/2254/27164/5308/8456/100131390	12
GO:0060173	limb development	12/263	179/18670	9.18578e-06	0.00139828	0.00126721	257/3229/3227/343637/7476/3207/2253/2254/27164/5308/8456/100131390	12
GO:0021521	ventral spinal cord interneuron specification	4/263	11/18670	1.17505e-05	0.00148432	0.00134518	6656/58524/84504/2128	4
GO:0060573	cell fate specification involved in pattern specification	4/263	11/18670	1.17505e-05	0.00148432	0.00134518	6656/58524/84504/2128	4
GO:0060079	excitatory postsynaptic potential	9/263	100/18670	1.1859e-05	0.00148432	0.00134518	2898/1144/7476/4887/1142/1136/1139/55584/50944	9
GO:0048706	embryonic skeletal system development	10/263	126/18670	1.19179e-05	0.00148432	0.00134518	3218/3231/3222/257/3227/3207/2254/1745/3975/2138	10
GO:0042391	regulation of membrane potential	19/263	434/18670	1.36658e-05	0.00162801	0.00147541	2565/10242/23620/89832/2898/1144/7476/4887/1142/131096/1136/1139/55584/2915/3359/10345/50944/478/885	19
GO:0001658	branching involved in ureteric bud morphogenesis	7/263	59/18670	1.85577e-05	0.00203392	0.00184327	3237/3207/2253/7475/7471/3975/2138	7
GO:0021872	forebrain generation of neurons	7/263	59/18670	1.85577e-05	0.00203392	0.00184327	6656/7080/2253/27164/1745/431707/2066	7
GO:0099565	chemical synaptic transmission, postsynaptic	9/263	108/18670	2.21135e-05	0.00233043	0.00211198	2898/1144/7476/4887/1142/1136/1139/55584/50944	9
GO:0060675	ureteric bud morphogenesis	7/263	65/18670	3.52464e-05	0.00357686	0.00324157	3237/3207/2253/7475/7471/3975/2138	7
GO:0072171	mesonephric tubule morphogenesis	7/263	66/18670	3.89593e-05	0.00381244	0.00345507	3237/3207/2253/7475/7471/3975/2138	7
GO:0001822	kidney development	14/263	278/18670	4.26479e-05	0.00402949	0.00365178	2045/3227/8710/3237/3207/2253/9370/7475/7471/79727/3975/2138/4868/7827	14
GO:0060579	ventral spinal cord interneuron fate commitment	4/263	15/18670	4.64895e-05	0.00410907	0.00372389	6656/58524/84504/2128	4
GO:0060581	cell fate commitment involved in pattern specification	4/263	15/18670	4.64895e-05	0.00410907	0.00372389	6656/58524/84504/2128	4
GO:0072001	renal system development	14/263	293/18670	7.5116e-05	0.00638886	0.00578998	2045/3227/8710/3237/3207/2253/9370/7475/7471/79727/3975/2138/4868/7827	14
GO:0001708	cell fate specification	8/263	99/18670	7.89859e-05	0.00638886	0.00578998	6656/3670/26011/58524/3207/84504/2128/2138	8
GO:0021514	ventral spinal cord interneuron differentiation	4/263	17/18670	7.92778e-05	0.00638886	0.00578998	6656/58524/84504/2128	4
GO:0072078	nephron tubule morphogenesis	7/263	74/18670	8.18145e-05	0.00640491	0.00580453	3237/3207/2253/7475/7471/3975/2138	7
GO:0072088	nephron epithelium morphogenesis	7/263	76/18670	9.70451e-05	0.00738621	0.00669384	3237/3207/2253/7475/7471/3975/2138	7
GO:0031128	developmental induction	5/263	34/18670	0.000106369	0.00787706	0.00713868	7080/3227/3207/2253/7471	5
GO:0061333	renal tubule morphogenesis	7/263	78/18670	0.000114507	0.00804487	0.00729076	3237/3207/2253/7475/7471/3975/2138	7
GO:0072028	nephron morphogenesis	7/263	78/18670	0.000114507	0.00804487	0.00729076	3237/3207/2253/7475/7471/3975/2138	7
GO:0003156	regulation of animal organ formation	5/263	37/18670	0.000160989	0.0110277	0.00999402	3670/3227/3207/2253/2138	5
GO:0051384	response to glucocorticoid	9/263	146/18670	0.000229795	0.0149617	0.0135592	3670/6770/4747/23205/9370/7200/84676/4654/7356	9
GO:0021513	spinal cord dorsal/ventral patterning	4/263	22/18670	0.00023052	0.0149617	0.0135592	6656/58524/84504/2128	4
GO:0001709	cell fate determination	5/263	40/18670	0.000234801	0.0149617	0.0135592	3670/4909/7476/7471/4654	5
GO:0001655	urogenital system development	14/263	330/18670	0.000259583	0.015895	0.0144051	2045/3227/8710/3237/3207/2253/9370/7475/7471/79727/3975/2138/4868/7827	14
GO:2000027	regulation of animal organ morphogenesis	12/263	253/18670	0.00026105	0.015895	0.0144051	3670/3227/55966/5083/7476/58524/3207/2253/7475/7471/3975/2138	12
GO:0048645	animal organ formation	6/263	64/18670	0.000279223	0.0163618	0.0148281	3670/3227/4909/3207/2253/2138	6
GO:0001656	metanephros development	7/263	90/18670	0.000280658	0.0163618	0.0148281	3227/3207/2253/9370/3975/2138/7827	7
GO:0035878	nail development	3/263	10/18670	0.000308216	0.0168902	0.015307	3229/343637/8456	3
GO:0072015	glomerular visceral epithelial cell development	3/263	10/18670	0.000308216	0.0168902	0.015307	9370/4868/7827	3
GO:2000252	negative regulation of feeding behavior	3/263	10/18670	0.000308216	0.0168902	0.015307	4887/7200/885	3
GO:0021511	spinal cord patterning	4/263	24/18670	0.000327526	0.0169325	0.0153453	6656/58524/84504/2128	4
GO:0021871	forebrain regionalization	4/263	24/18670	0.000327526	0.0169325	0.0153453	7080/2253/7471/3975	4
GO:0021884	forebrain neuron development	4/263	24/18670	0.000327526	0.0169325	0.0153453	6656/2253/27164/431707	4
GO:0072080	nephron tubule development	7/263	93/18670	0.000343384	0.0174236	0.0157903	3237/3207/2253/7475/7471/3975/2138	7
GO:0030900	forebrain development	15/263	381/18670	0.00035015	0.0174438	0.0158087	6656/3670/7080/4747/9001/7476/2253/27164/5308/1745/63974/7471/3975/431707/2066	15
GO:0060993	kidney morphogenesis	7/263	94/18670	0.000366623	0.0179384	0.0162569	3237/3207/2253/7475/7471/3975/2138	7
GO:0061326	renal tubule development	7/263	95/18670	0.000391105	0.0188005	0.0170382	3237/3207/2253/7475/7471/3975/2138	7
GO:0072310	glomerular epithelial cell development	3/263	11/18670	0.000419391	0.0198126	0.0179554	9370/4868/7827	3
GO:0001657	ureteric bud development	7/263	97/18670	0.000443987	0.0202284	0.0183322	3237/3207/2253/7475/7471/3975/2138	7
GO:0014706	striated muscle tissue development	15/263	390/18670	0.000447166	0.0202284	0.0183322	3670/26011/245806/1144/2248/2253/2254/150572/4654/4624/2066/129446/2138/137868/4868	15
GO:0042481	regulation of odontogenesis	4/263	26/18670	0.000450722	0.0202284	0.0183322	5083/58524/2253/7475	4
GO:0007548	sex differentiation	12/263	270/18670	0.000469647	0.0202284	0.0183322	7080/6770/9468/7476/58524/3207/2253/2254/8999/132625/3975/431707	12
GO:0072163	mesonephric epithelium development	7/263	98/18670	0.000472487	0.0202284	0.0183322	3237/3207/2253/7475/7471/3975/2138	7
GO:0072164	mesonephric tubule development	7/263	98/18670	0.000472487	0.0202284	0.0183322	3237/3207/2253/7475/7471/3975/2138	7
GO:0031960	response to corticosteroid	9/263	162/18670	0.000494709	0.0208539	0.0188991	3670/6770/4747/23205/9370/7200/84676/4654/7356	9
GO:0060259	regulation of feeding behavior	4/263	27/18670	0.000523291	0.0217245	0.0196881	339403/4887/7200/885	4
GO:0042476	odontogenesis	8/263	132/18670	0.000570712	0.0233396	0.0211518	5083/58524/2253/5308/1745/7475/258/431707	8
GO:0001823	mesonephros development	7/263	102/18670	0.000601416	0.0242335	0.0219619	3237/3207/2253/7475/7471/3975/2138	7
GO:0035094	response to nicotine	5/263	49/18670	0.000613829	0.0243752	0.0220904	6770/1144/1142/1136/1139	5
GO:0021536	diencephalon development	6/263	75/18670	0.000659308	0.0258072	0.0233881	3670/7080/9001/2253/5308/7471	6
GO:0007492	endoderm development	6/263	76/18670	0.000707502	0.0270855	0.0245466	7080/3227/5083/2253/3975/4317	6
GO:0060537	muscle tissue development	15/263	408/18670	0.000711736	0.0270855	0.0245466	3670/26011/245806/1144/2248/2253/2254/150572/4654/4624/2066/129446/2138/137868/4868	15
GO:0007274	neuromuscular synaptic transmission	4/263	30/18670	0.000790508	0.0296711	0.0268898	60482/1144/1142/1136	4
GO:0043523	regulation of neuron apoptotic process	10/263	210/18670	0.000816885	0.0302468	0.0274116	2045/3670/6770/2898/4747/4909/2253/1745/2914/79625	10
GO:1904645	response to amyloid-beta	5/263	54/18670	0.000961511	0.0351272	0.0318344	4322/1139/2915/4314/478	5
GO:0022617	extracellular matrix disassembly	6/263	81/18670	0.000990709	0.0357177	0.0323696	440387/1504/4322/4314/4317/1215	6
GO:0090596	sensory organ morphogenesis	11/263	256/18670	0.00105735	0.0376251	0.0340982	6656/3229/2253/2254/5308/55584/7471/3975/84465/6101/2138	11
GO:0043524	negative regulation of neuron apoptotic process	8/263	147/18670	0.00115311	0.0405067	0.0367097	3670/6770/2898/4747/4909/2253/1745/79625	8
GO:0035107	appendage morphogenesis	8/263	148/18670	0.00120447	0.041253	0.037386	257/3227/7476/3207/2253/2254/27164/100131390	8
GO:0035108	limb morphogenesis	8/263	148/18670	0.00120447	0.041253	0.037386	257/3227/7476/3207/2253/2254/27164/100131390	8
GO:0010092	specification of animal organ identity	4/263	34/18670	0.00128001	0.0432992	0.0392404	3670/3227/3207/2253	4
GO:0048754	branching morphogenesis of an epithelial tube	8/263	150/18670	0.00131265	0.0435517	0.0394692	7080/3237/3207/2253/7475/7471/3975/2138	8
GO:0014048	regulation of glutamate secretion	3/263	16/18670	0.00135106	0.0435517	0.0394692	11255/7200/885	3
GO:0060850	regulation of transcription involved in cell fate commitment	3/263	16/18670	0.00135106	0.0435517	0.0394692	84504/1745/2128	3
GO:0072224	metanephric glomerulus development	3/263	16/18670	0.00135106	0.0435517	0.0394692	9370/3975/7827	3
GO:0050804	modulation of chemical synaptic transmission	15/263	436/18670	0.00138277	0.0440558	0.0399261	6770/2898/22986/9001/4909/7476/9515/4887/1142/9370/1136/1139/2915/2914/50944	15
GO:0099177	regulation of trans-synaptic signaling	15/263	437/18670	0.00141423	0.0445401	0.040365	6770/2898/22986/9001/4909/7476/9515/4887/1142/9370/1136/1139/2915/2914/50944	15
GO:0035137	hindlimb morphogenesis	4/263	36/18670	0.00159041	0.0488858	0.0443033	257/7476/2253/27164	4
GO:0048521	negative regulation of behavior	3/263	17/18670	0.00162358	0.0488858	0.0443033	4887/7200/885	3
GO:0061318	renal filtration cell differentiation	3/263	17/18670	0.00162358	0.0488858	0.0443033	9370/4868/7827	3
GO:0072112	glomerular visceral epithelial cell differentiation	3/263	17/18670	0.00162358	0.0488858	0.0443033	9370/4868/7827	3
